# Supplementary material for: Marine natural products-inspired phenylmethylene hydantoins with potent in vitro and in vivo antitumor activities via suppression of Brk and FAK signaling
Source: Royal Society of Chemistry journal article supplement (doi:10.1039/c4ob00553h), 2014-01-01
Supplement: c4ob00553h1.pdf [file c4ob00553h1.pdf]

## Supplementary Information

### **Marine Natural Products-Inspired Phenylmethylene Hydantoins with Potent *in Vitro* and *in Vivo* Antitumor Activities via Suppression of Brk and FAK Signaling**

Asmaa A. Sallam<sup>a</sup>, Mohamed M. Mohyeldin<sup>a</sup>, Ahmed I. Foudah<sup>a</sup>, Mohamed R. Akl<sup>a</sup>, Sami  
Nazzal<sup>a</sup>, Sharon A. Meyer<sup>b</sup>, Yong-Yu Liu<sup>a</sup>, Khalid A. El Sayed<sup>a\*</sup>

<sup>a</sup>Department of Basic Pharmaceutical Sciences, College of Pharmacy, University of Louisiana at  
Monroe, USA.

<sup>b</sup>Department of Toxicology, College of Pharmacy, University of Louisiana at Monroe, USA.

\* To whom Correspondence should be addressed. Telephone 318-342-1725.

Fax: 318-342-1737.

E-mail: [elsayed@ulm.edu](mailto:elsayed@ulm.edu)

## Table of Contents

|                                                                      | Page number |
|----------------------------------------------------------------------|-------------|
| Table S1. <sup>1</sup> H NMR data of compounds <b>3-7</b> .....      | 3           |
| Table S2. <sup>1</sup> H NMR data of compounds <b>8-11</b> .....     | 4           |
| Table S3. <sup>1</sup> H NMR data of compounds <b>12-13</b> .....    | 5           |
| Table S4. <sup>13</sup> C NMR data of compounds <b>3-8</b> .....     | 6           |
| Table S5. <sup>13</sup> C NMR data of compounds <b>9-13</b> .....    | 7           |
| Fig. SI1. <sup>1</sup> H NMR Spectrum of <b>3</b> .....              | 8           |
| Fig. SI2. <sup>13</sup> C NMR (PENDANT) Spectrum of <b>3</b> .....   | 9           |
| Fig. SI3. <sup>1</sup> H NMR Spectrum of <b>4</b> .....              | 10          |
| Fig. SI4. <sup>13</sup> C NMR (PENDANT) Spectrum of <b>4</b> .....   | 11          |
| Fig. SI5. <sup>1</sup> H NMR Spectrum of <b>5</b> .....              | 12          |
| Fig. SI6. <sup>13</sup> C NMR (PENDANT) Spectrum of <b>5</b> .....   | 13          |
| Fig. SI7. <sup>1</sup> H NMR Spectrum of <b>6</b> .....              | 14          |
| Fig. SI8. <sup>13</sup> C NMR (PENDANT) Spectrum of <b>6</b> .....   | 15          |
| Fig. SI9. <sup>1</sup> H NMR Spectrum of <b>7</b> .....              | 16          |
| Fig. SI10. <sup>13</sup> C NMR (PENDANT) Spectrum of <b>7</b> .....  | 17          |
| Fig. SI11. <sup>1</sup> H NMR Spectrum of <b>8</b> .....             | 18          |
| Fig. SI12. <sup>13</sup> C NMR (PENDANT) Spectrum of <b>8</b> .....  | 19          |
| Fig. SI13. <sup>1</sup> H NMR Spectrum of <b>9</b> .....             | 20          |
| Fig. SI14. <sup>13</sup> C NMR (PENDANT) Spectrum of <b>9</b> .....  | 21          |
| Fig. SI15. <sup>1</sup> H NMR Spectrum of <b>10</b> .....            | 22          |
| Fig. SI16. <sup>13</sup> C NMR (PENDANT) Spectrum of <b>10</b> ..... | 23          |
| Fig. SI17. <sup>1</sup> H NMR Spectrum of <b>11</b> .....            | 24          |
| Fig. SI18. <sup>13</sup> C NMR (PENDANT) Spectrum of <b>11</b> ..... | 25          |
| Fig. SI19. <sup>1</sup> H NMR Spectrum of <b>12</b> .....            | 26          |
| Fig. SI20. <sup>13</sup> C NMR (PENDANT) Spectrum of <b>12</b> ..... | 27          |
| Fig. SI21. <sup>1</sup> H NMR Spectrum of <b>13</b> .....            | 28          |
| Fig. SI22. <sup>13</sup> C NMR (PENDANT) Spectrum of <b>13</b> ..... | 29          |

**Table S1.**  $^1\text{H}$  NMR data of compounds **3-7**<sup>a</sup>

| Position                           | $\delta_H$              |                        |               |                        |                        |
|------------------------------------|-------------------------|------------------------|---------------|------------------------|------------------------|
|                                    | <b>3</b>                | <b>4</b>               | <b>5</b>      | <b>6</b>               | <b>7</b>               |
| 6                                  | 6.25, s                 | 6.24, s                | 6.38, s       | 6.39, s                | 6.41, s                |
| 7                                  | -----                   | -----                  | -----         | -----                  | -----                  |
| 8                                  | 6.87, brs               | 7.73, dd<br>(9.2, 1.1) | 7.44, d (8.2) | 8.07, d (2.2)          | 7.65, d (8.7)          |
| 9                                  | -----                   | 6.73, d (9.2)          | 7.58, d (8.2) | -----                  | 7.68, d (8.7)          |
| 10                                 | -----                   | -----                  | -----         | -----                  | -----                  |
| 11                                 | -----                   | -----                  | 7.58, d (8.2) | 7.42, d (8.8)          | 7.68, d (8.7)          |
| 12                                 | 7.05, dd<br>(2.3, 11.9) | -----                  | 7.44, d (8.2) | 7.80, dd<br>(2.2, 8.8) | 7.65, d (8.7)          |
| 1`                                 | -----                   | -----                  | -----         | 5.30, 2H, s            | -----                  |
| 2`                                 | -----                   | -----                  | -----         | -----                  | 7.27, t (8.7)          |
| 3`                                 | -----                   | -----                  | -----         | 7.21, t (8.7)          | 7.73, dd (8.7,<br>6.0) |
| 4`                                 | -----                   | -----                  | -----         | 7.47, dd (8.7,<br>6.0) | -----                  |
| 5`                                 | -----                   | -----                  | -----         | -----                  | 7.73, dd (8.7,<br>6.0) |
| 6`                                 | -----                   | -----                  | -----         | 7.47, dd (8.7, 6.0)    | 7.27, t (8.7)          |
| 7`                                 | -----                   | -----                  | -----         | 7.21, t (8.7)          | -----                  |
| -OCH <sub>3</sub>                  | 3.78, 3H, s             | -----                  | -----         | -----                  | -----                  |
| -N(CH <sub>3</sub> ) <sub>2</sub>  | -----                   | 3.10, 6H, s            | -----         | -----                  | -----                  |
| -SC(CH <sub>3</sub> ) <sub>3</sub> | -----                   | -----                  | 1.21, 9H, s   | -----                  | -----                  |

<sup>a</sup>In DMSO, 400 MHz. Coupling constants (*J*) are in Hertz.

**Table S2.**  $^1\text{H}$  NMR data of compounds **8-11**<sup>a</sup>

| Position                          | $\delta_H$          |               |               |           |
|-----------------------------------|---------------------|---------------|---------------|-----------|
|                                   | <b>8</b>            | <b>9</b>      | <b>10</b>     | <b>11</b> |
| 6                                 | 6.39, s             | 6.41, s       | 6.40, s       | 6.10, s   |
| 7                                 | -----               | -----         | -----         | -----     |
| 8                                 | 7.57, d (8.7)       | 7.70, d (8.7) | 7.71, d (8.2) | -----     |
| 9                                 | 7.04, d (8.7)       | 7.27, d (8.7) | 7.67, d (8.2) | -----     |
| 10                                | -----               | -----         | -----         | -----     |
| 11                                | 7.04, d (8.7)       | 7.27, d (8.7) | 7.67, d (8.2) | -----     |
| 12                                | 7.57, d (8.7)       | 7.70, d (8.7) | 7.71, d (8.2) | -----     |
| 1`                                | 5.15, 2H, s         | -----         | -----         | -----     |
| 2`                                | -----               | 6.81, m       | -----         | -----     |
| 3`                                | -----               | -----         | -----         | -----     |
| 4`                                | 7.48, m             | -----         | -----         | -----     |
| 5`                                | 7.29, dd (9.3, 8.7) | -----         | -----         | -----     |
| 6`                                | 7.39, dd (8.7, 8.2) | -----         | -----         | 6.10, s   |
| 7`                                | -----               | -----         | -----         | -----     |
| -OCH <sub>3</sub><br>(C-9)        | -----               | -----         | -----         | -----     |
| -OCH <sub>3</sub><br>(C-10)       | -----               | -----         | -----         | -----     |
| -N(CH <sub>3</sub> ) <sub>2</sub> | -----               | -----         | -----         | -----     |

<sup>a</sup>In DMSO, 400 MHz. Coupling constants (*J*) are in Hertz.

**Table S3.**  $^1\text{H}$  NMR data of compounds **12-13**<sup>a</sup>

| Position                          | $\delta_H$             |                |
|-----------------------------------|------------------------|----------------|
|                                   | <b>12</b>              | <b>13</b>      |
| 6                                 | 6.29, s                | 6.36, s        |
| 7                                 | -----                  | -----          |
| 8                                 | 7.26, dd<br>(6.8, 1.8) | 6.98, d (12.4) |
| 9                                 | 6.65, dd<br>(6.8, 1.8) | -----          |
| 10                                | -----                  | -----          |
| 11                                | -----                  | 7.05, d (7.3)  |
| 12                                | -----                  | -----          |
| 1`                                | -----                  | -----          |
| 2`                                | -----                  | -----          |
| 3`                                | -----                  | -----          |
| 4`                                | -----                  | -----          |
| 5`                                | -----                  | -----          |
| 6`                                | -----                  | -----          |
| -OCH <sub>3</sub><br>(C-9)        | -----                  | 3.80, s        |
| -OCH <sub>3</sub><br>(C-10)       | -----                  | 3.78, s        |
| -N(CH <sub>3</sub> ) <sub>2</sub> | -----                  | -----          |

<sup>a</sup>In DMSO, 400 MHz. Coupling constants ( $J$ ) are in Hertz.

**Table S4.**  $^{13}\text{C}$  NMR data of compounds **3-8**<sup>a</sup>

| Position                           | $\delta_{\text{C}}$   |                       |                       |                       |           |                       |
|------------------------------------|-----------------------|-----------------------|-----------------------|-----------------------|-----------|-----------------------|
|                                    | <b>3</b>              | <b>4</b>              | <b>5</b>              | <b>6</b>              | <b>7</b>  | <b>8</b>              |
| 2                                  | 156.7, qC             | 156.0, qC             | 156.2, qC             | 156.3, qC             | 156.3, qC | 156.2, qC             |
| 4                                  | 166.5, qC             | 165.7, qC             | 166.0, qC             | 165.9, qC             | 166.2, qC | 166.2, qC             |
| 5                                  | 126.1, qC             | 128.5, qC             | 129.2, qC             | 126.5, qC             | 128.6, qC | 126.6, qC             |
| 6                                  | 110.6, CH             | 98.8, CH              | 107.7, CH             | 106.3, CH             | 108.3, CH | 109.0, CH             |
| 7                                  | 121.1, qC             | 109.8, qC             | 134.1, qC             | 128.8, qC             | 132.7, qC | 126.9, qC             |
| 8                                  | 109.9, CH             | 134.4, CH             | 130.0, CH             | 125.4, CH             | 127.3, CH | 131.7, CH             |
| 9                                  | 151.3, qC             | 112.5, CH             | 137.5, CH             | 140.6, qC             | 130.5, CH | 115.4, CH             |
| 10                                 | 150.7, qC             | 161, qC               | 132.7, qC             | 150.5, qC             | 139.2, qC | 160.7, qC             |
| 11                                 | 153.7, qC             | 154.7, qC             | 137.5, CH             | 115.9, CH             | 130.5, CH | 115.4, CH             |
| 12                                 | 109.7, CH             | 163.2, qC             | 130.0, CH             | 135.4, CH             | 127.3, CH | 131.7, CH             |
| 1`                                 | -----                 | -----                 | -----                 | 70.4, CH <sub>2</sub> | 136.3, qC | 70.4, CH <sub>2</sub> |
| 2`                                 | -----                 | -----                 | -----                 | 132.6, qC             | 129.2, CH | 136.0, qC             |
| 3`                                 | -----                 | -----                 | -----                 | 130.4, CH             | 116.4, CH | 163.2, qC             |
| 4`                                 | -----                 | -----                 | -----                 | 116.1, CH             | 161.4, qC | 126.6, CH             |
| 5`                                 | -----                 | -----                 | -----                 | 163.7, qC             | 116.4, CH | 132.5, CH             |
| 6`                                 | -----                 | -----                 | -----                 | 116.1, CH             | 129.2, CH | 132.4, CH             |
| 7`                                 | -----                 | -----                 | -----                 | 130.4, CH             | -----     | 158.9, qC             |
| -OCH <sub>3</sub>                  | 56.7, CH <sub>3</sub> | -----                 | -----                 | -----                 | -----     | -----                 |
| -N(CH <sub>3</sub> ) <sub>2</sub>  | -----                 | 42.8, CH <sub>3</sub> | -----                 | -----                 | -----     | -----                 |
| -CN                                | -----                 | 115.1, qC             | -----                 | -----                 | -----     | -----                 |
| -SC(CH <sub>3</sub> ) <sub>3</sub> | -----                 | -----                 | 46.8, qC              | -----                 | -----     | -----                 |
| -SC(CH <sub>3</sub> ) <sub>3</sub> | -----                 | -----                 | 31.2, CH <sub>3</sub> | -----                 | -----     | -----                 |

<sup>a</sup>In DMSO, 100 MHz. Carbon multiplicities were determined by pendant experiments.  
qC = quaternary. CH = methine, CH<sub>2</sub> = methylene, CH<sub>3</sub> = methyl carbons.

**Table S5.**  $^{13}\text{C}$  NMR data of compounds **9-13**<sup>a</sup>

| Position                          | $\delta_{\text{C}}$ |           |           |           |                       |
|-----------------------------------|---------------------|-----------|-----------|-----------|-----------------------|
|                                   | <b>9</b>            | <b>10</b> | <b>11</b> | <b>12</b> | <b>13</b>             |
| 2                                 | 156.4, qC           | 156.3, qC | 156.4, qC | 156.0, qC | 156.2, qC             |
| 4                                 | 166.1, qC           | 166.0, qC | 165.6, qC | 165.8, qC | 166.2, qC             |
| 5                                 | 132.4, qC           | 122.7, qC | 135.3, qC | 127.8, qC | 128.3, qC             |
| 6                                 | 107.9, CH           | 106.6, CH | 91.2, CH  | 100.1, CH | 111.5, CH             |
| 7                                 | 129.2, qC           | 128.5, qC | 115.0, qC | 111.1, qC | 111.9, qC             |
| 8                                 | 131.8, CH           | 136.8, CH | 142.7, qC | 124.3, CH | 100.4, CH             |
| 9                                 | 122.3, CH           | 131.0, CH | 142.7, qC | 114.3, CH | 145.8, qC             |
| 10                                | 148.1, qC           | 130.3, qC | 115.0, qC | 148.7, qC | 154.3, qC             |
| 11                                | 122.3, CH           | 131.0, CH | 142.7, qC | 142.1, qC | 101.0, CH             |
| 12                                | 131.8, CH           | 136.8, CH | 142.7, qC | 139.7, qC | 150.8, qC             |
| 1`                                | 117.0, qC           | -----     | -----     | -----     | -----                 |
| 2`                                | 108.7, CH           | -----     | 156.4, qC | -----     | -----                 |
| 3`                                | -----               | -----     | -----     | -----     | -----                 |
| 4`                                | -----               | -----     | 165.6, qC | -----     | -----                 |
| 5`                                | -----               | -----     | 135.3, qC | -----     | -----                 |
| 6`                                | -----               | -----     | 91.2, CH  | -----     | -----                 |
| 7`                                | -----               | -----     | -----     | -----     | -----                 |
| -OCH <sub>3</sub>                 | -----               | -----     | -----     | -----     | 56.6, CH <sub>3</sub> |
| -N(CH <sub>3</sub> ) <sub>2</sub> | -----               | -----     | -----     | -----     | 56.7, CH <sub>3</sub> |
| -SCF <sub>3</sub>                 | -----               | 136.7, qC | -----     | -----     | -----                 |

<sup>a</sup>In DMSO, 100 MHz. Carbon multiplicities were determined by pendant experiments.  
qC = quaternary. CH = methine, CH<sub>2</sub> = methylene, CH<sub>3</sub> = methyl carbons.

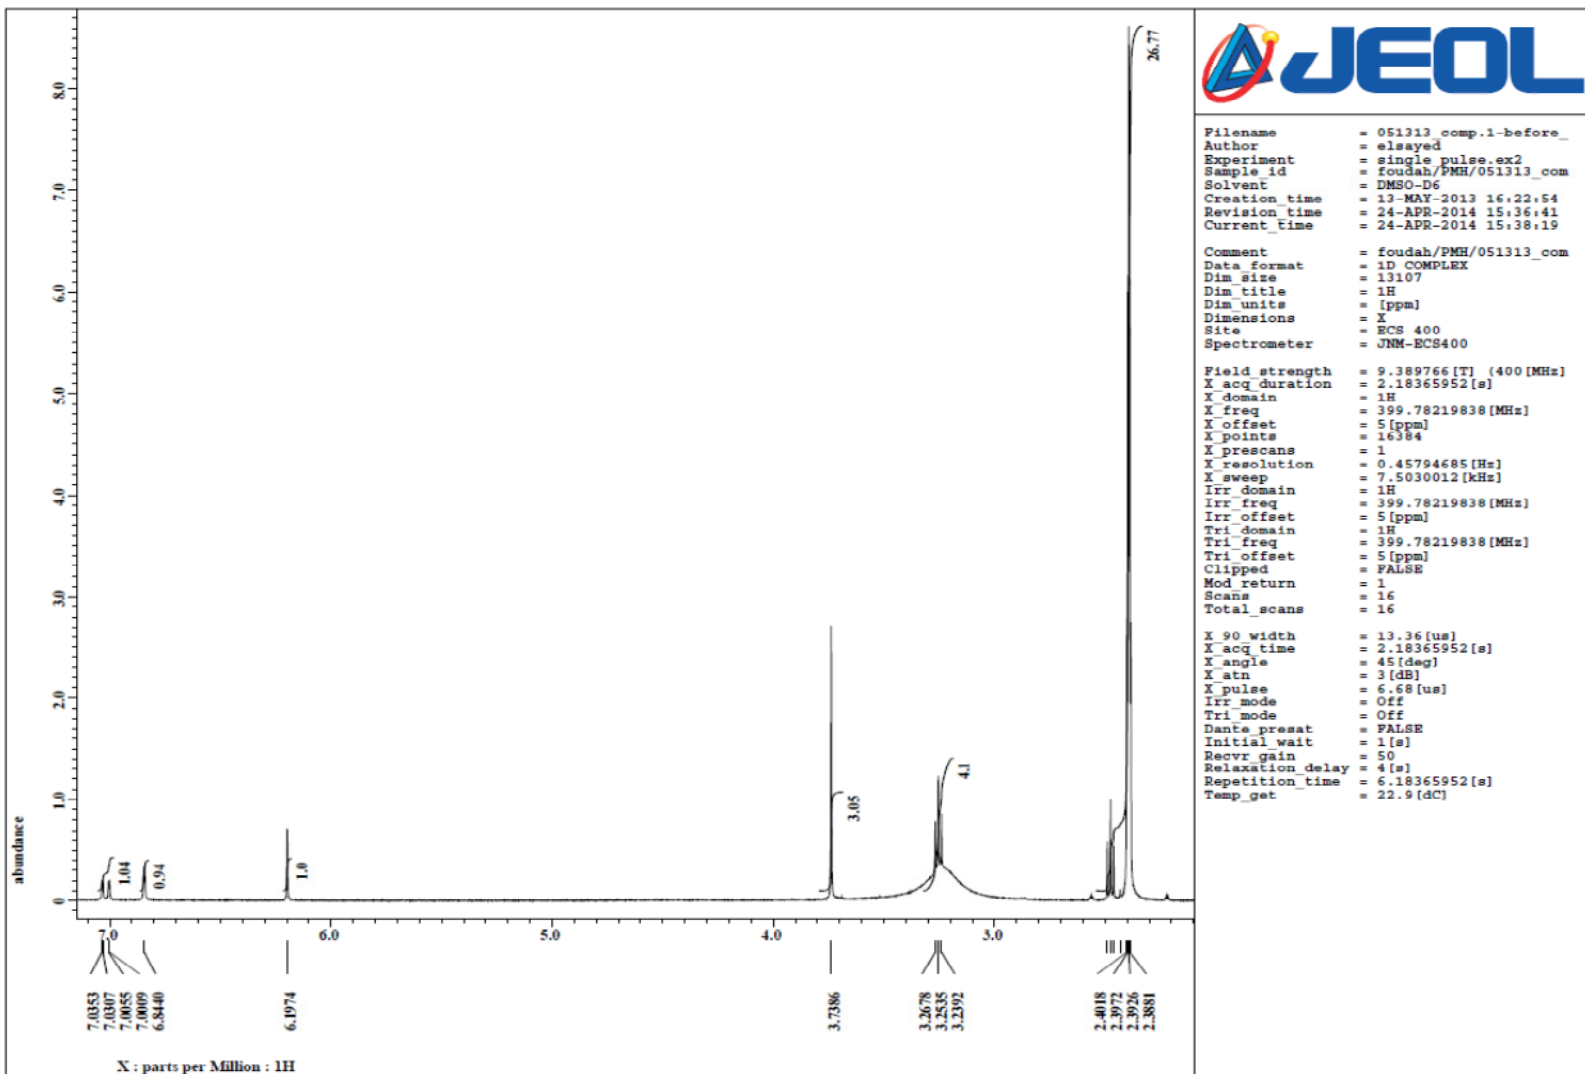

Figure S11. <sup>1</sup>H NMR Spectrum of 3.



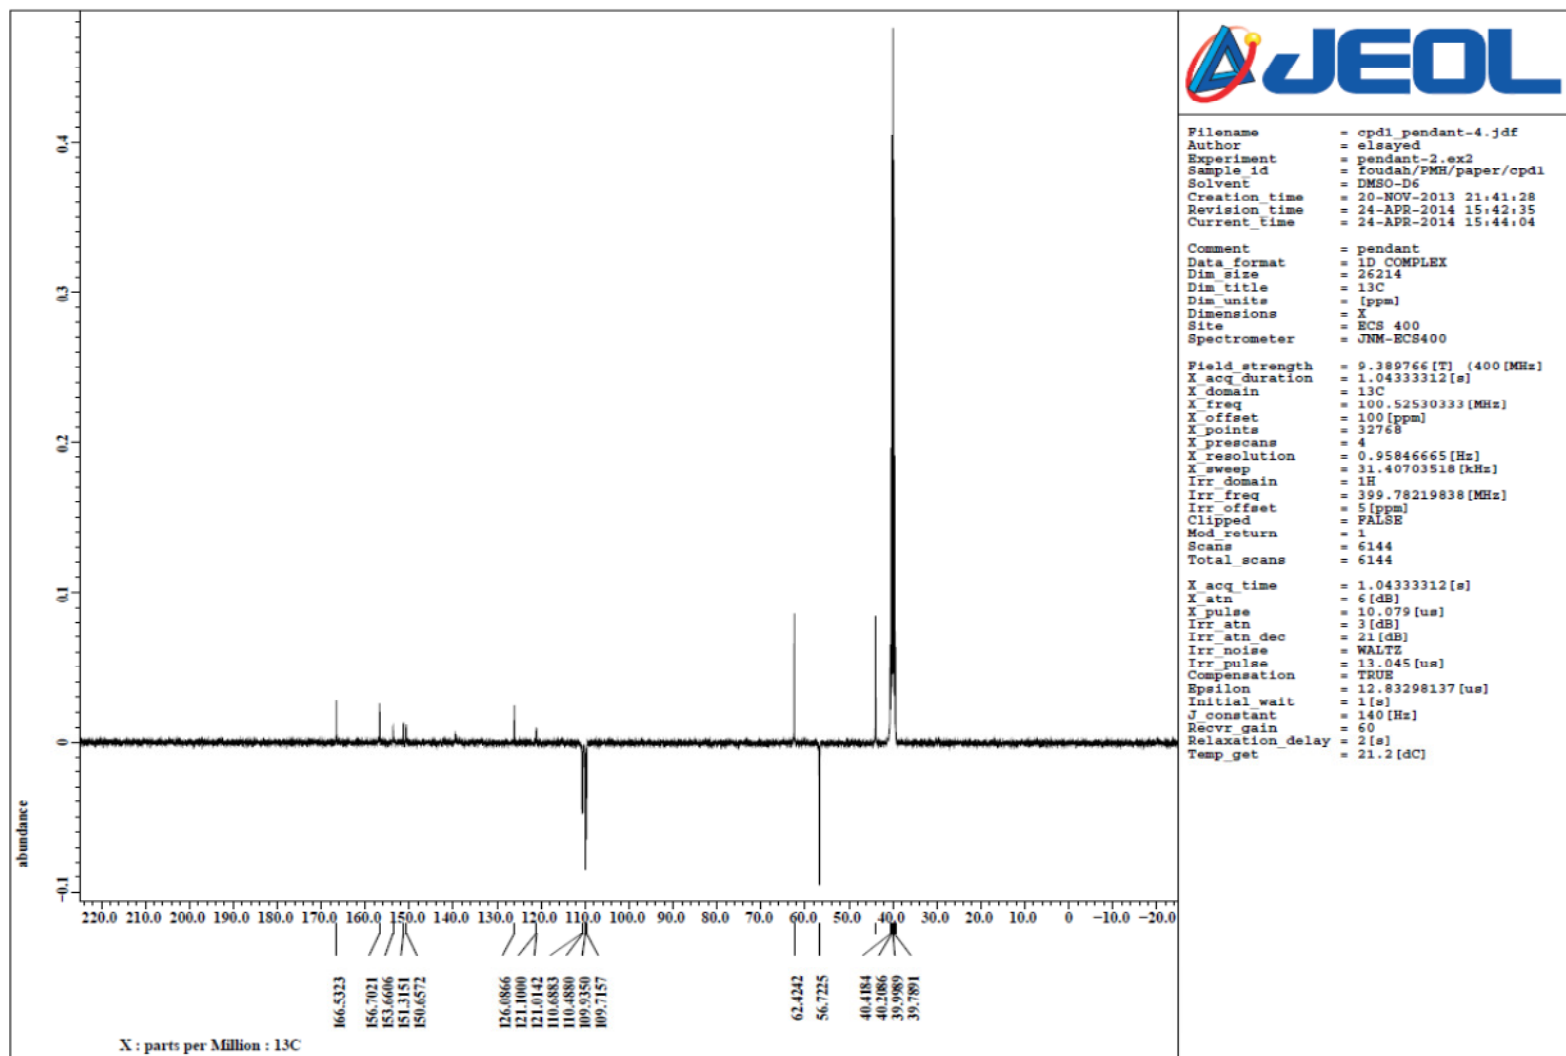

Figure SI2.  $^{13}\text{C}$  NMR (PENDANT) Spectrum of 3.

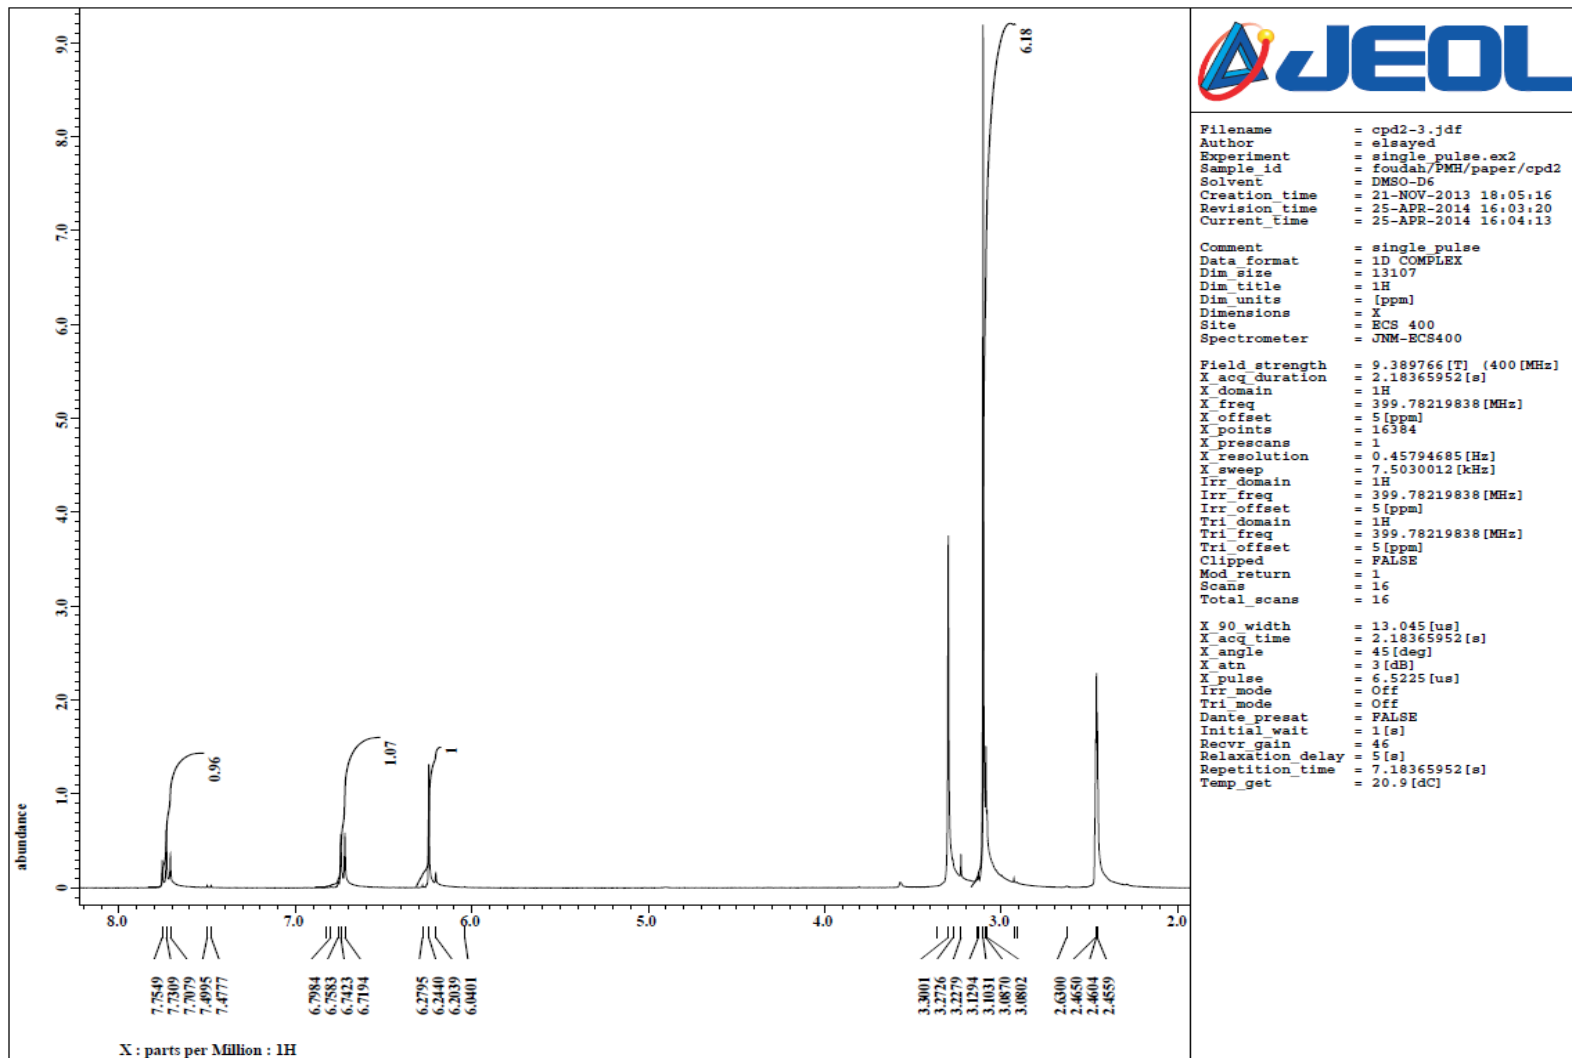

Figure SI3.  $^1\text{H}$  NMR Spectrum of **4**.

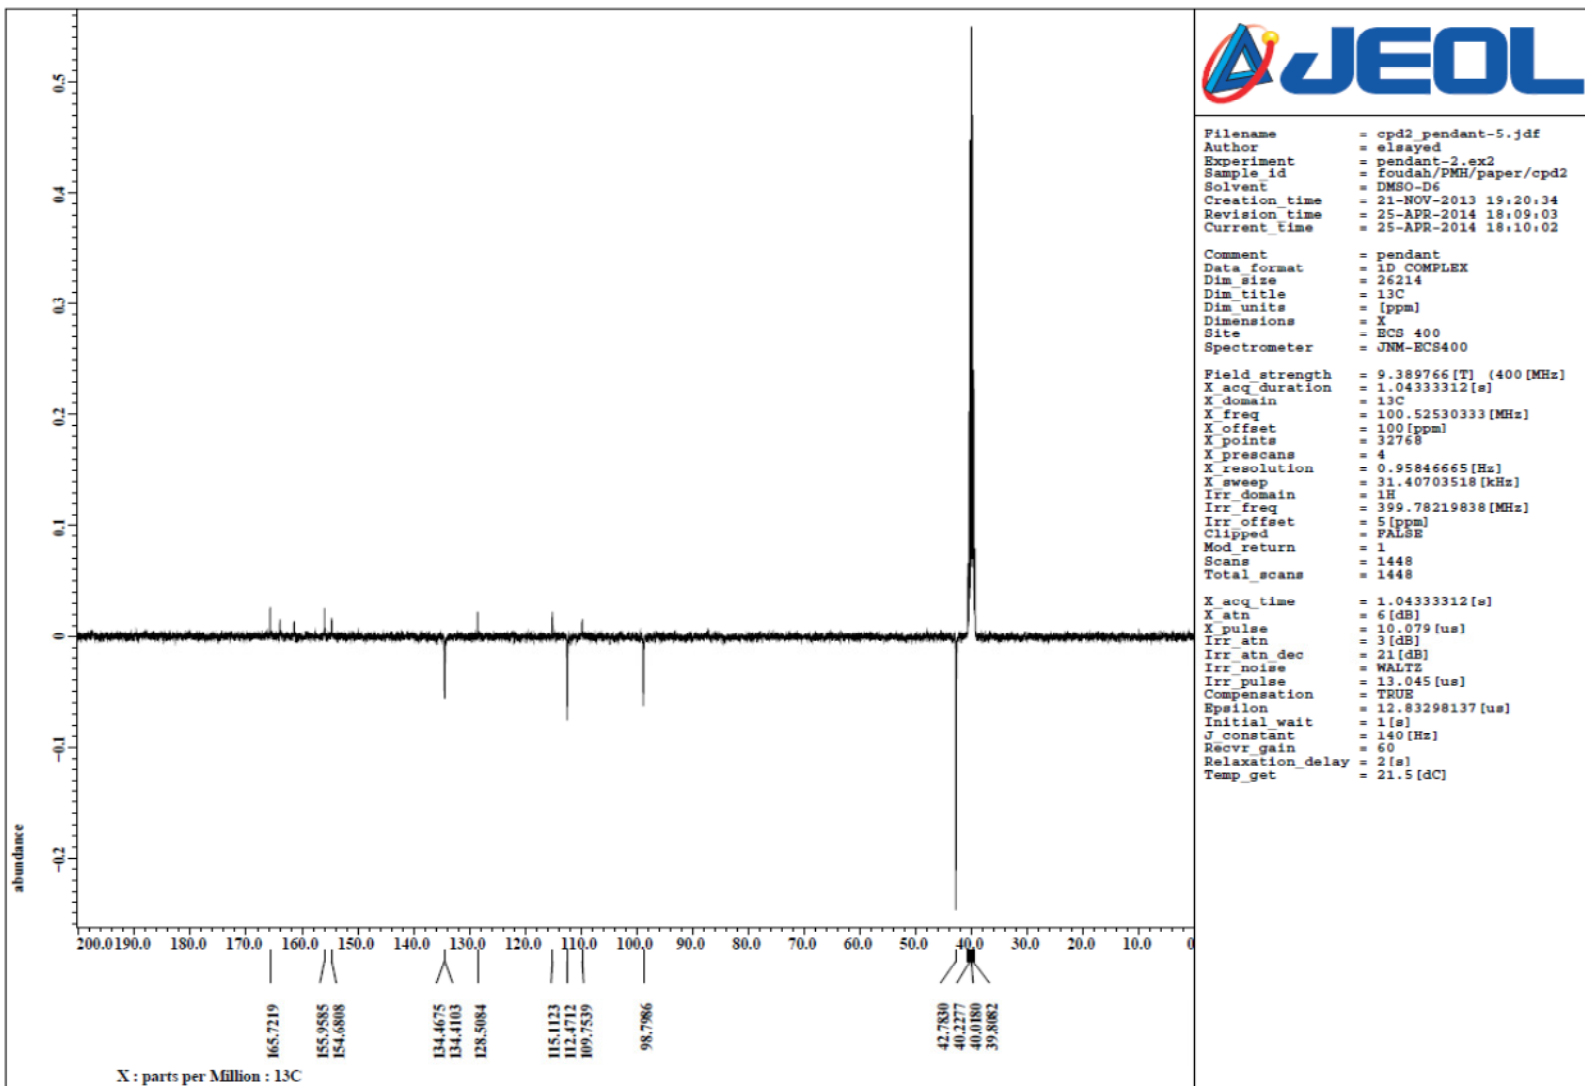

Figure SI4.  $^{13}\text{C}$  NMR (PENDANT) Spectrum of **4**.

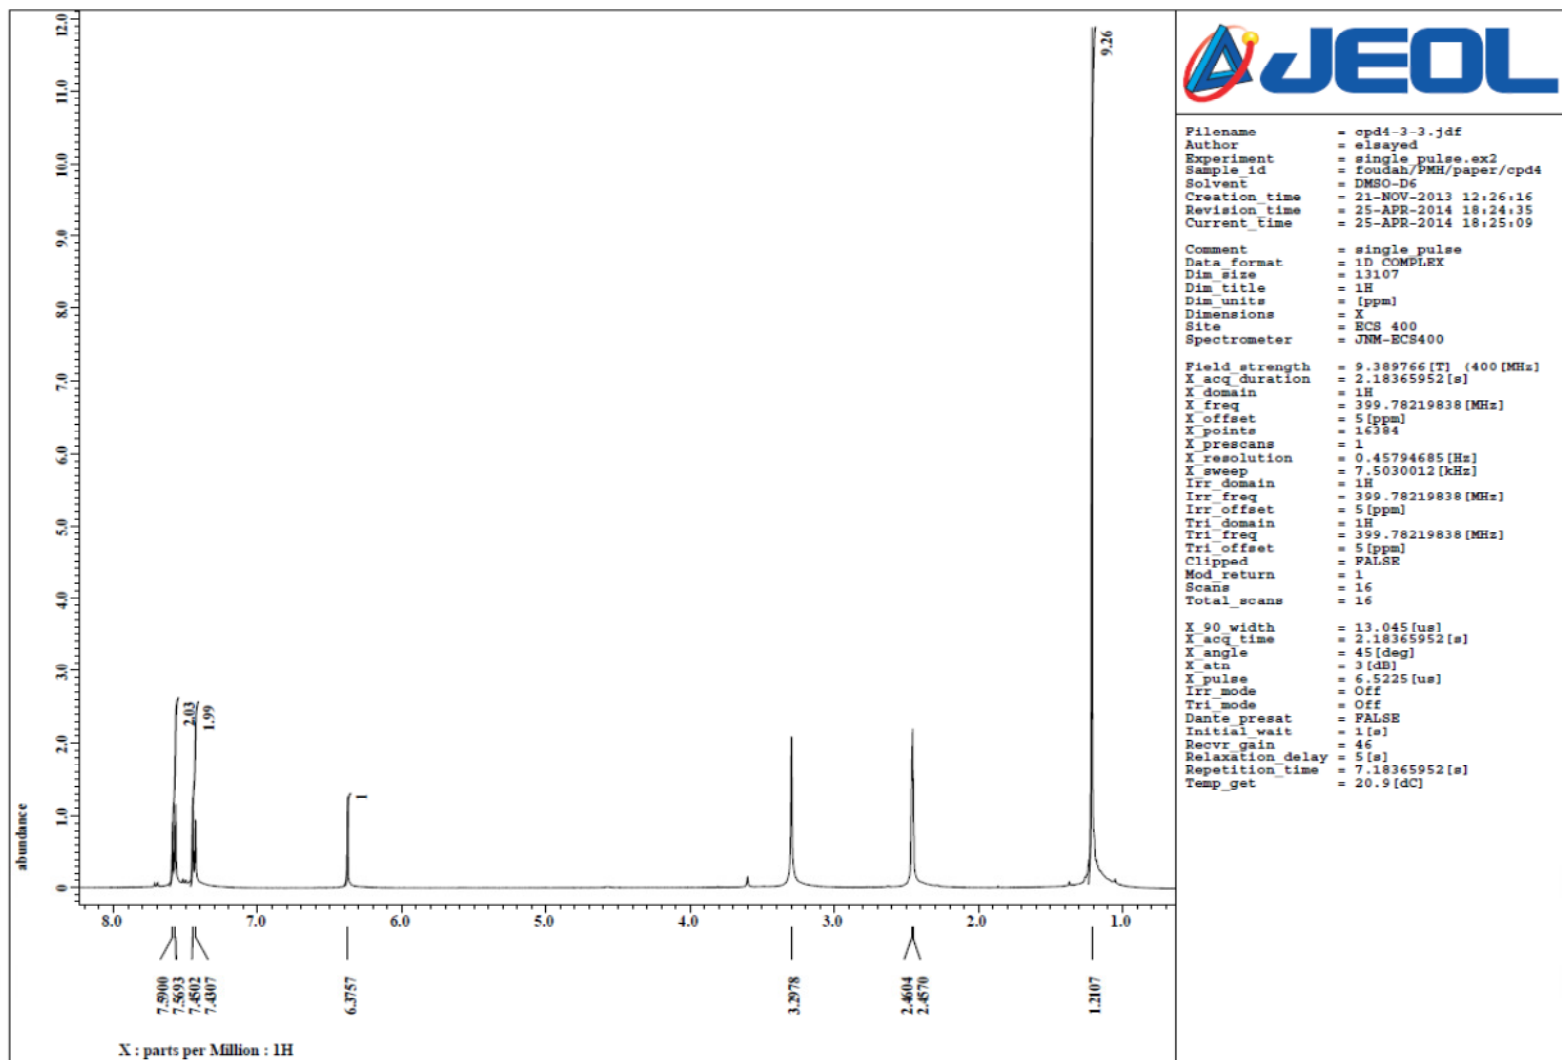

Figure SI5.  $^1\text{H}$  NMR Spectrum of **5**.

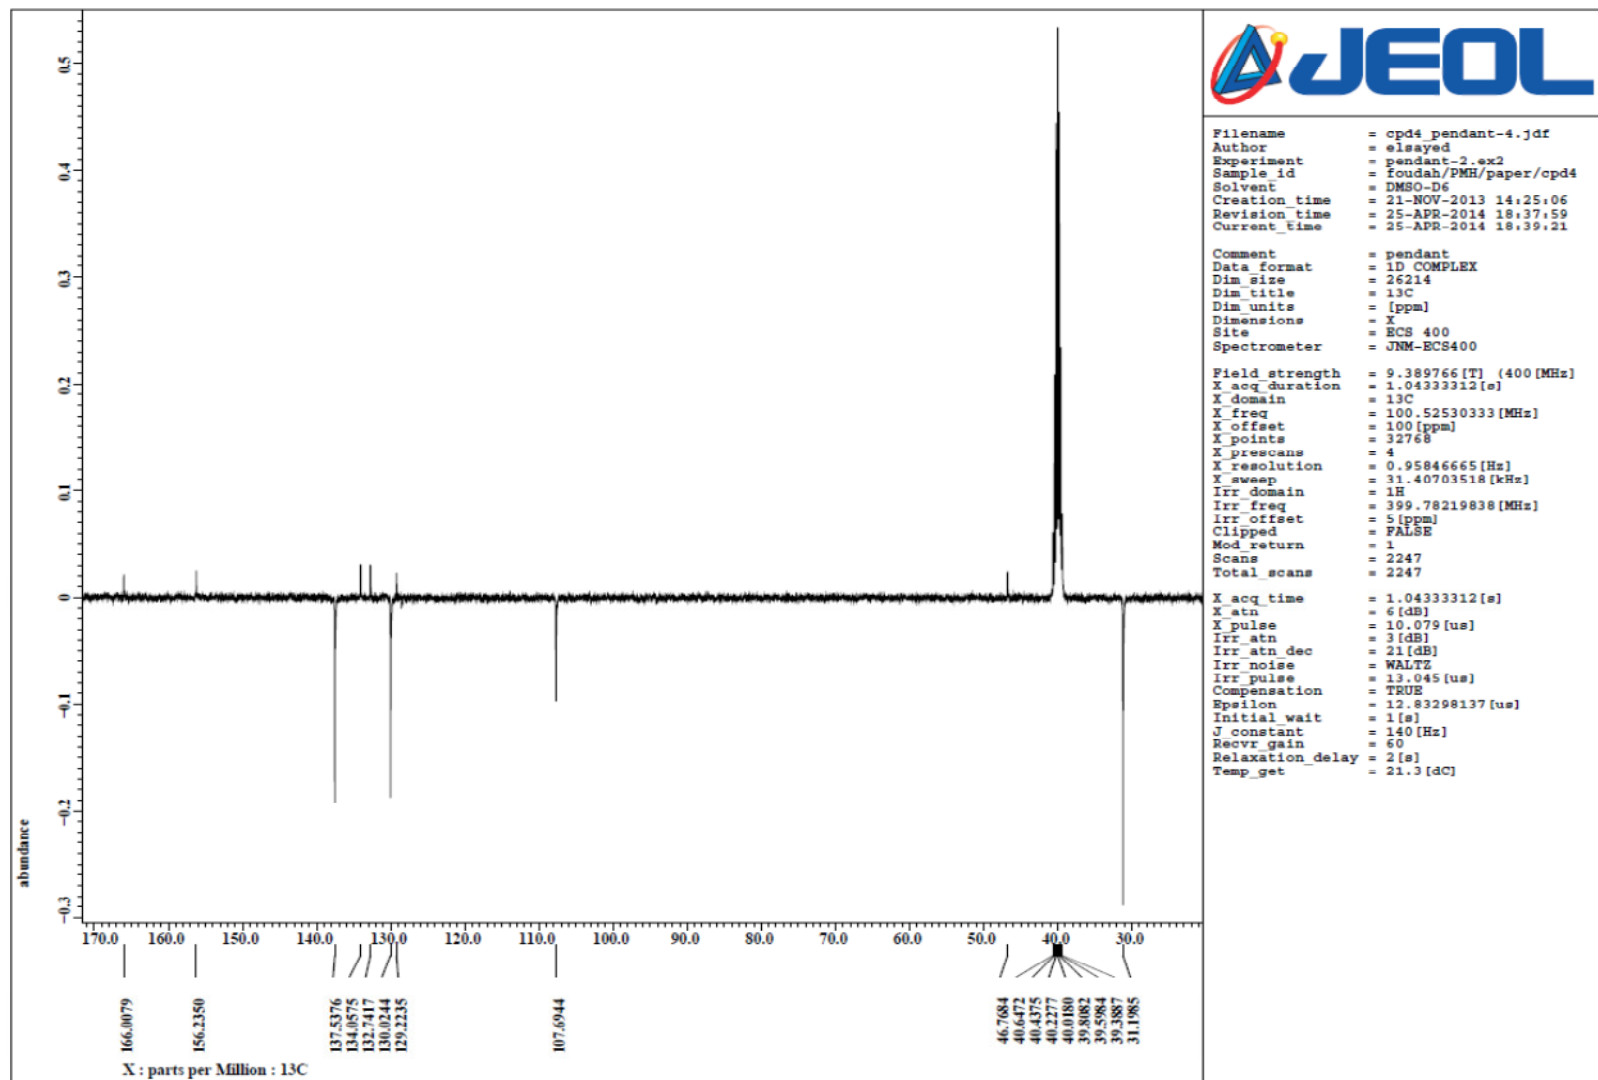

Figure SI6.  $^{13}\text{C}$  NMR (PENDANT) Spectrum of 5.

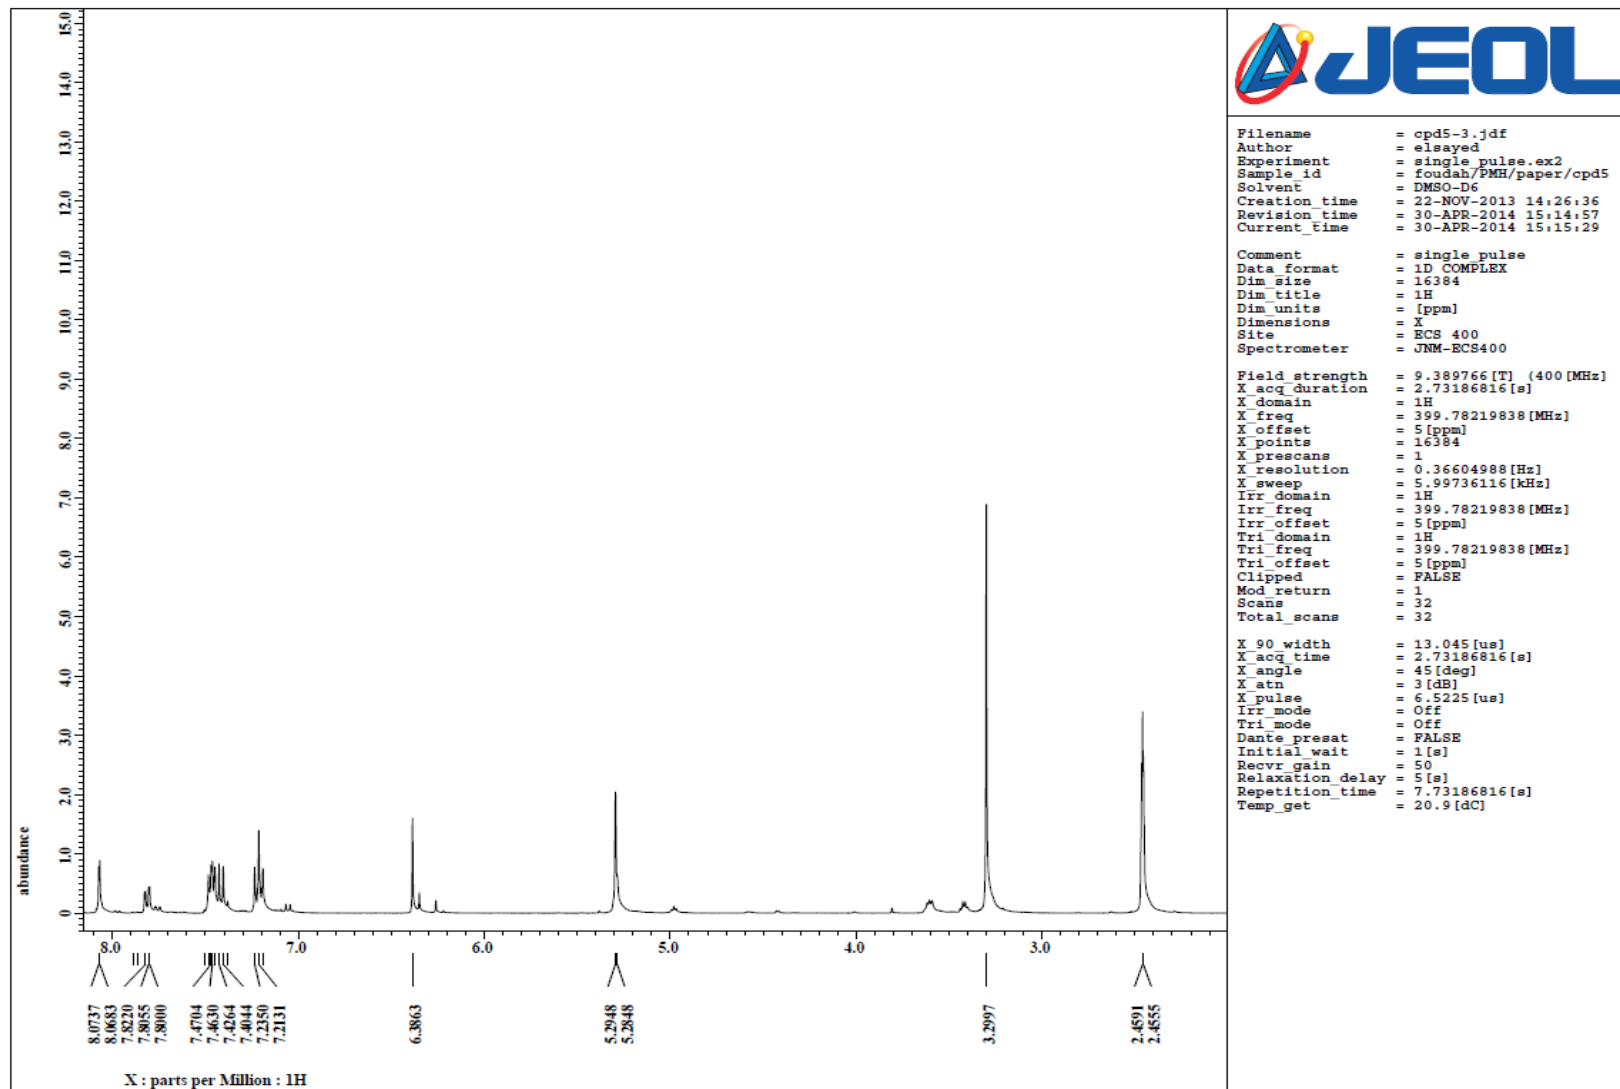

Figure SI7.  $^1\text{H}$  NMR Spectrum of 6.

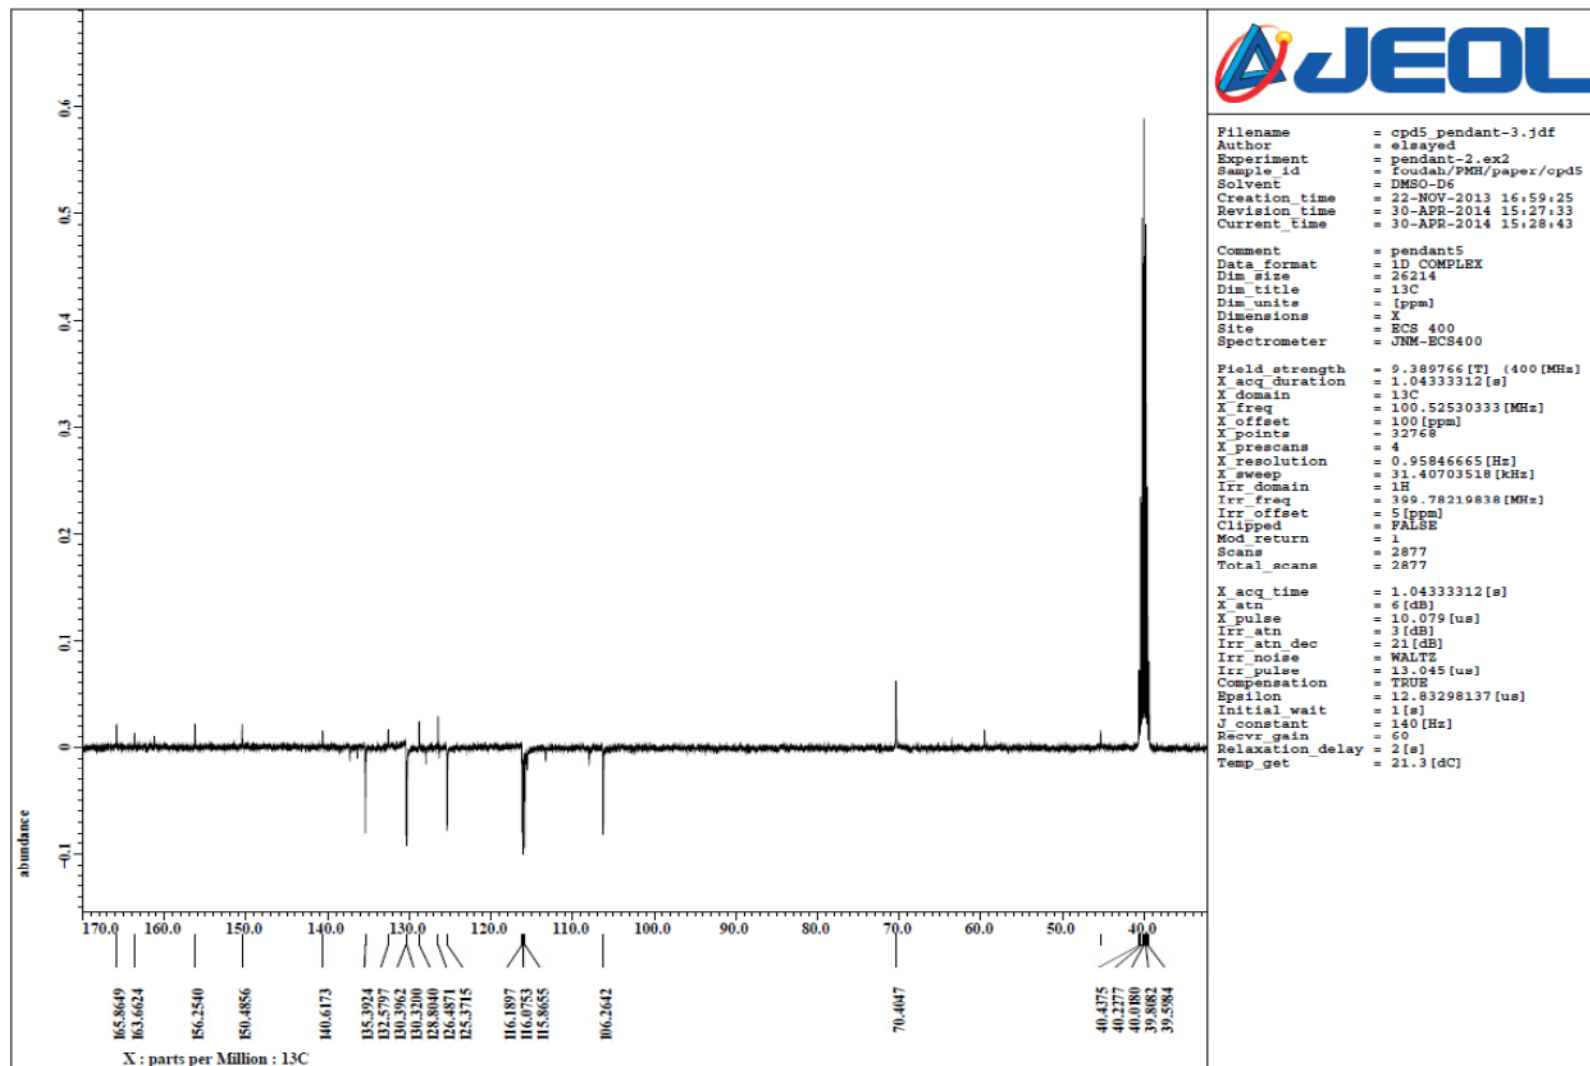

Figure S18.  $^{13}\text{C}$  NMR (PENDANT) Spectrum of **6**.

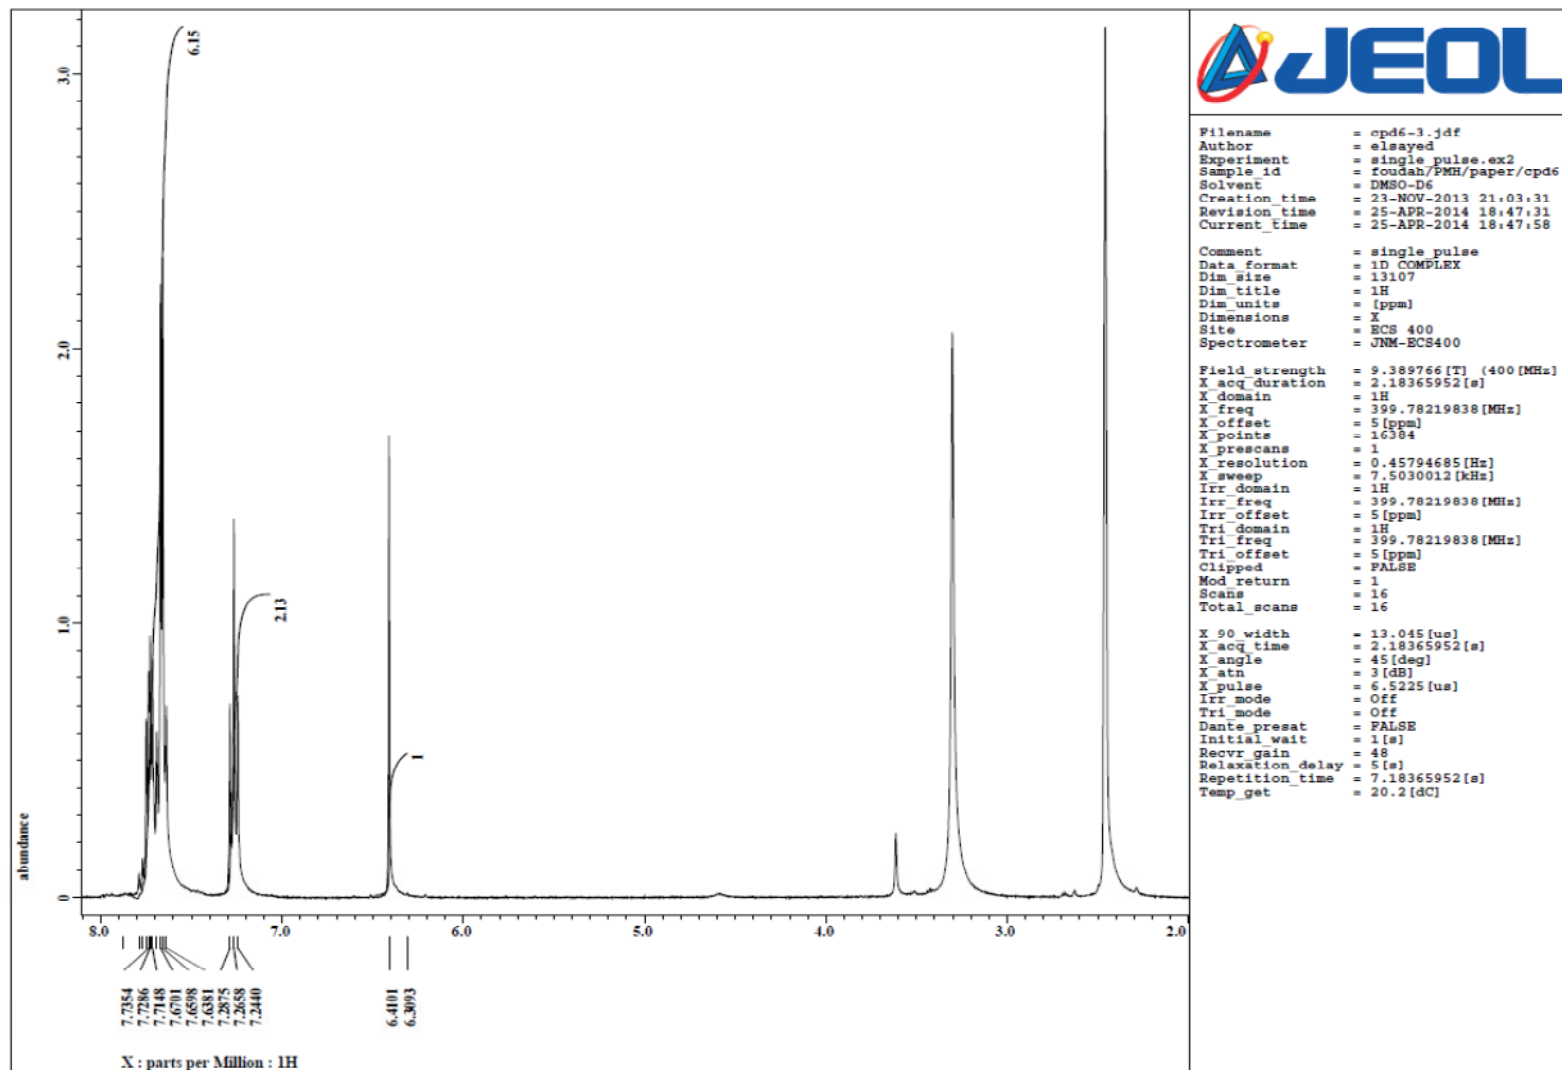

Figure SI9.  $^1\text{H}$  NMR Spectrum of 7.



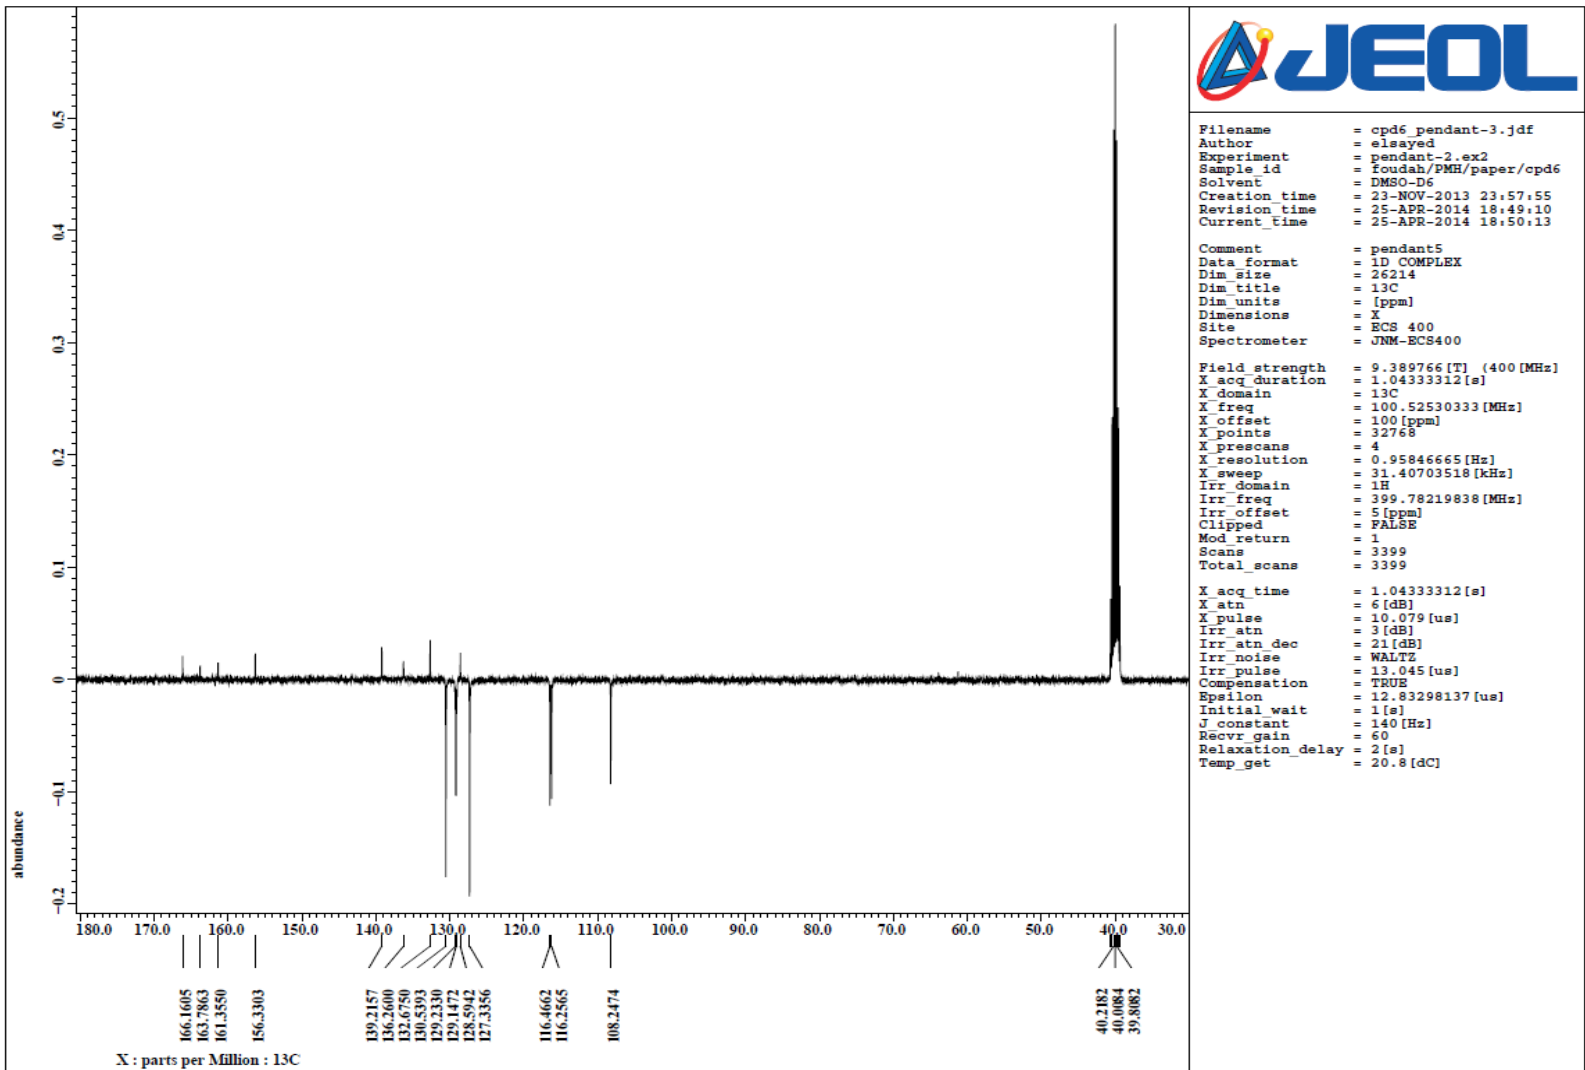

Figure SI10.  $^{13}\text{C}$  NMR (PENDANT) Spectrum of 7.

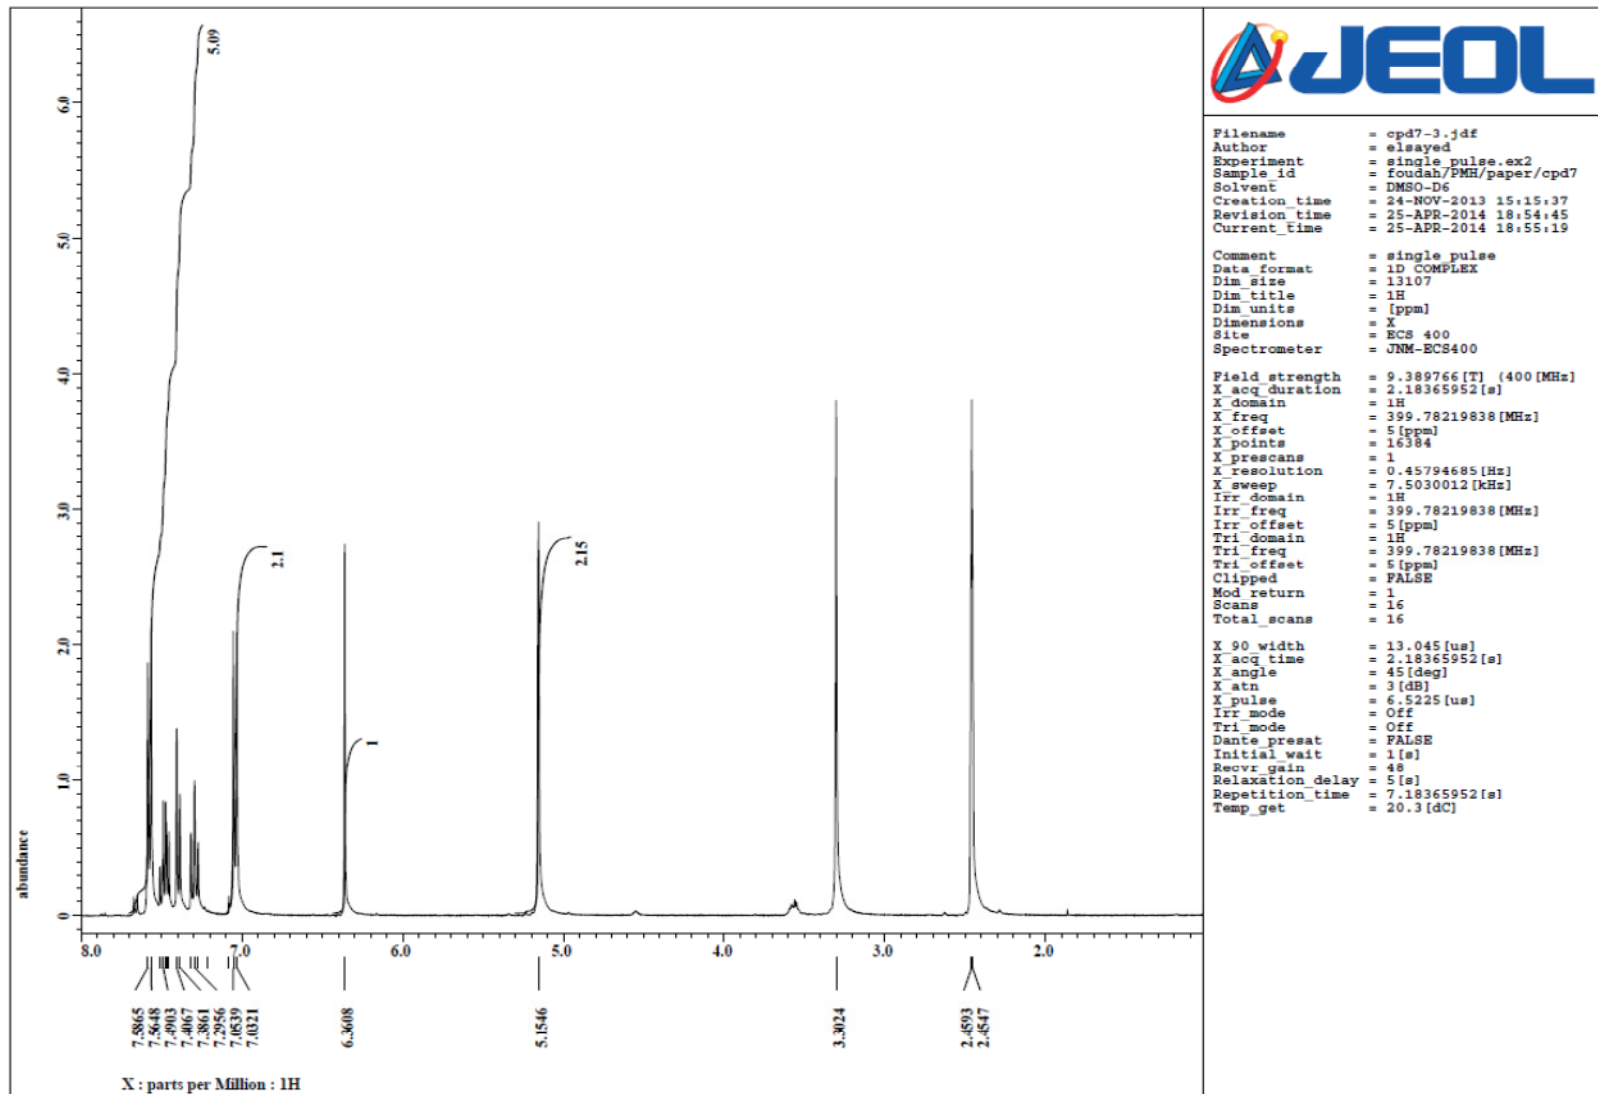

Figure SI11.  $^1\text{H}$  NMR Spectrum of **8**.

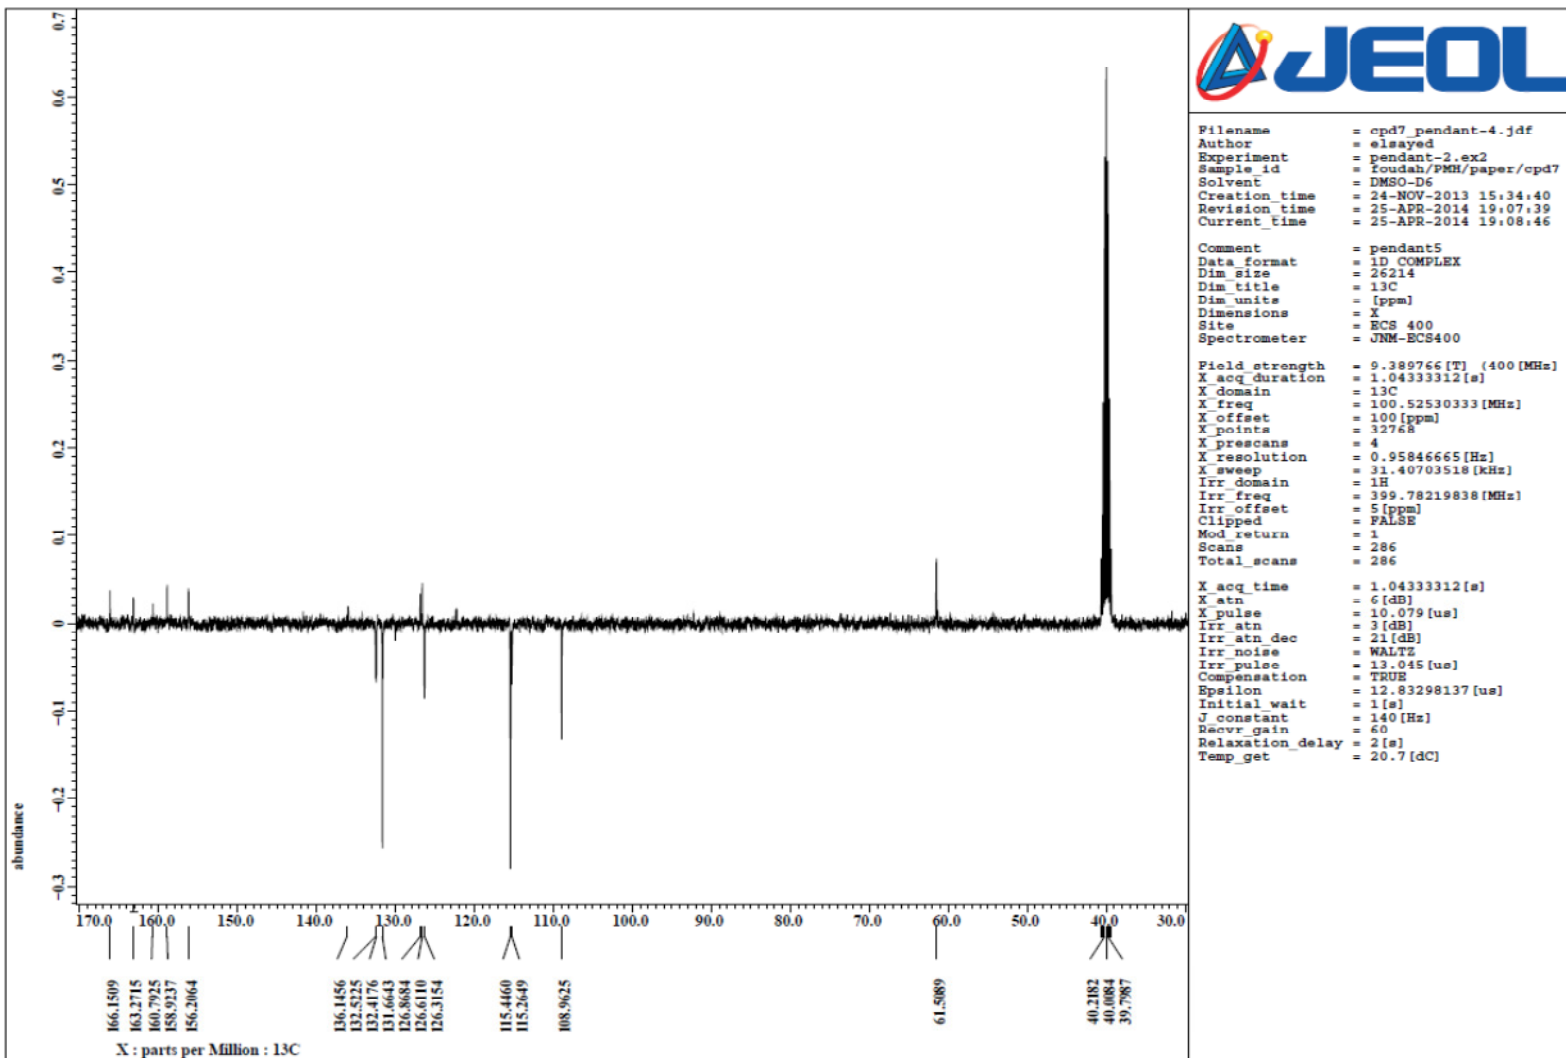

Figure SI12.  $^{13}\text{C}$  NMR (PENDANT) Spectrum of **8**.

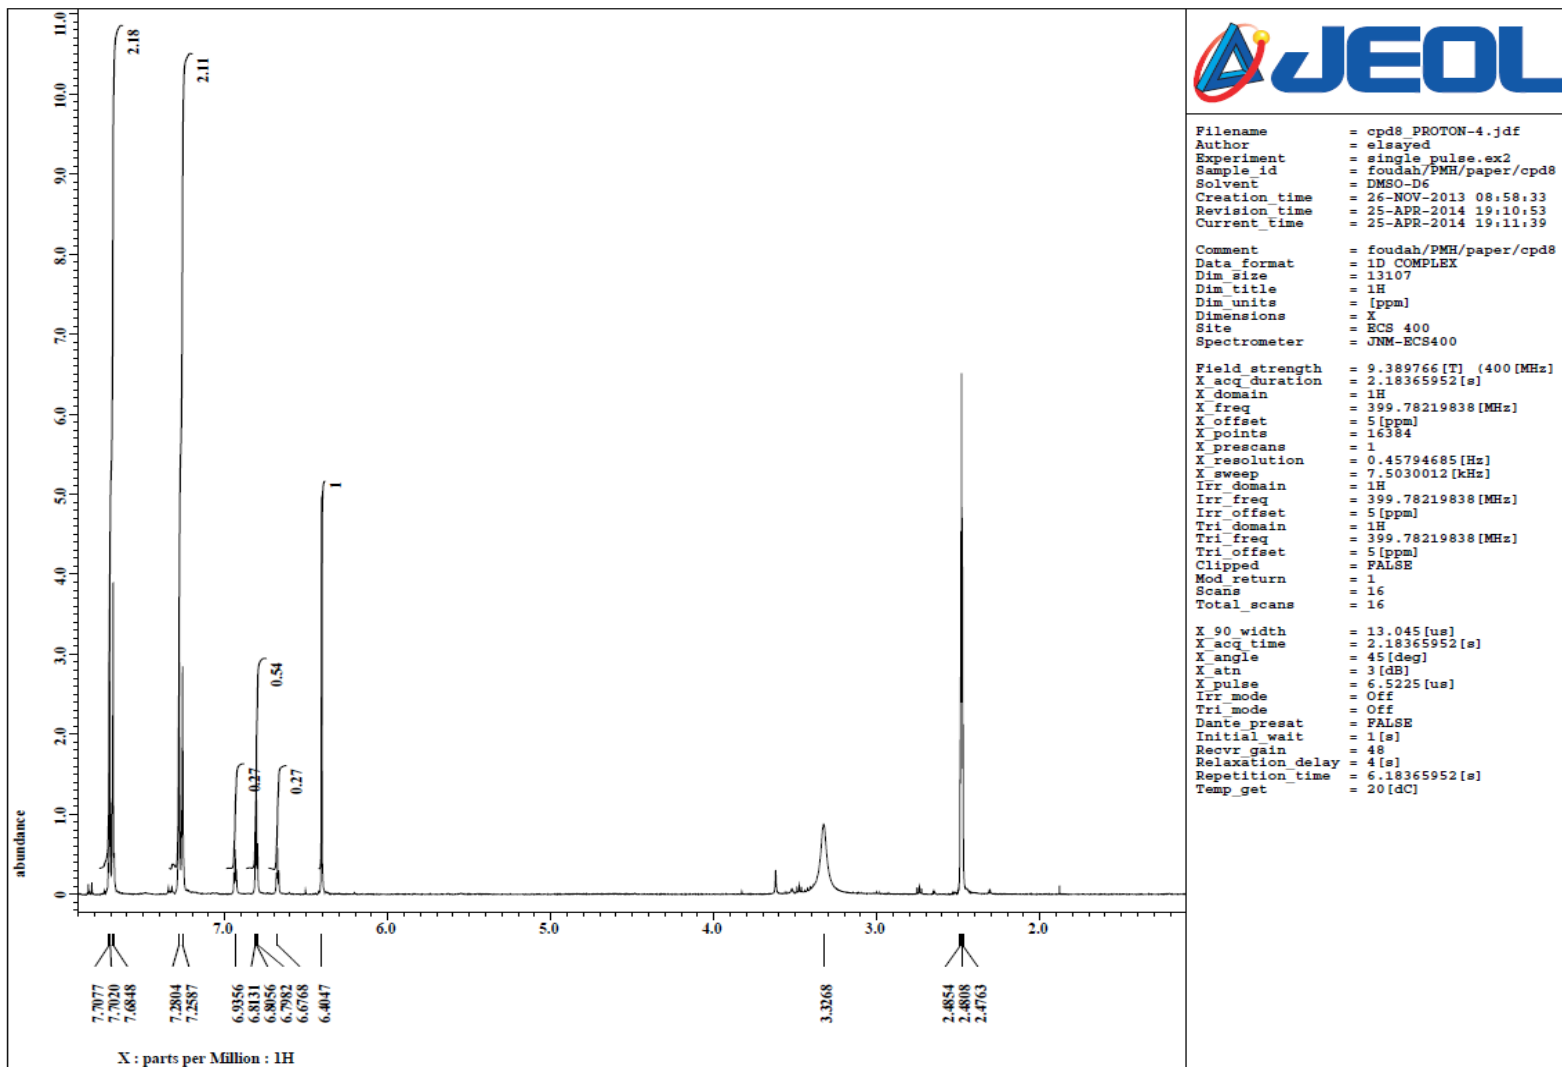

Figure SI13.  $^1\text{H}$  NMR Spectrum of **9**.

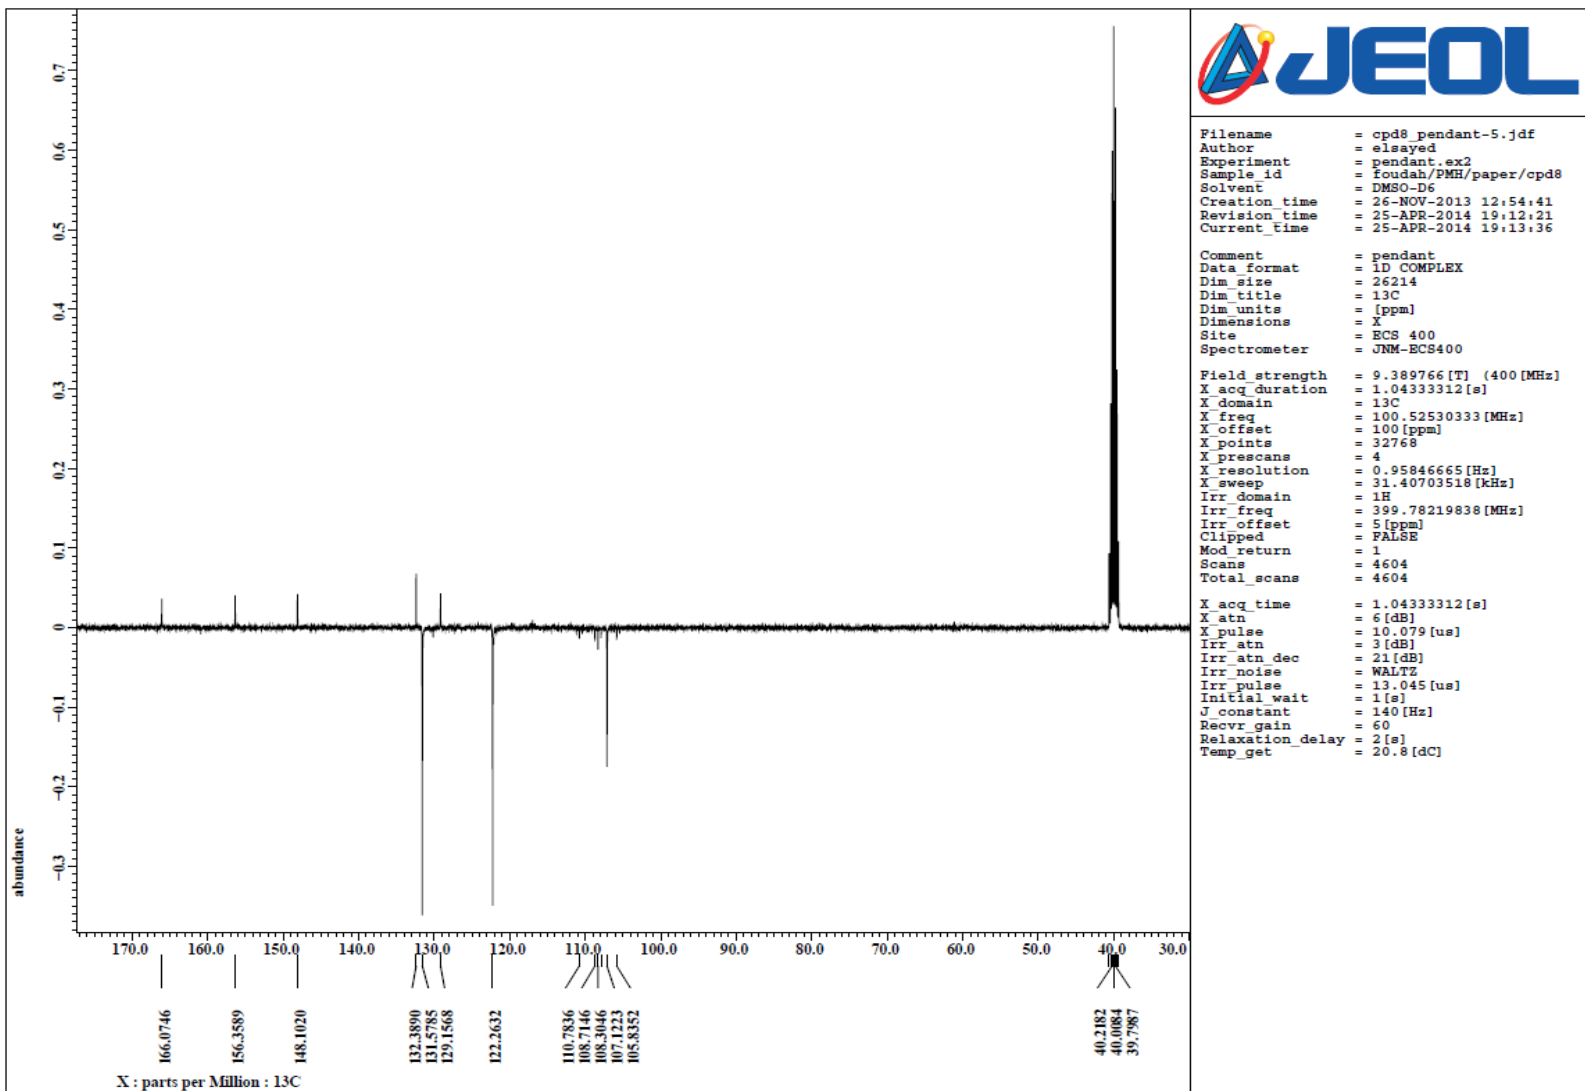

Figure SI14.  $^{13}\text{C}$  NMR (PENDANT) Spectrum of **9**.

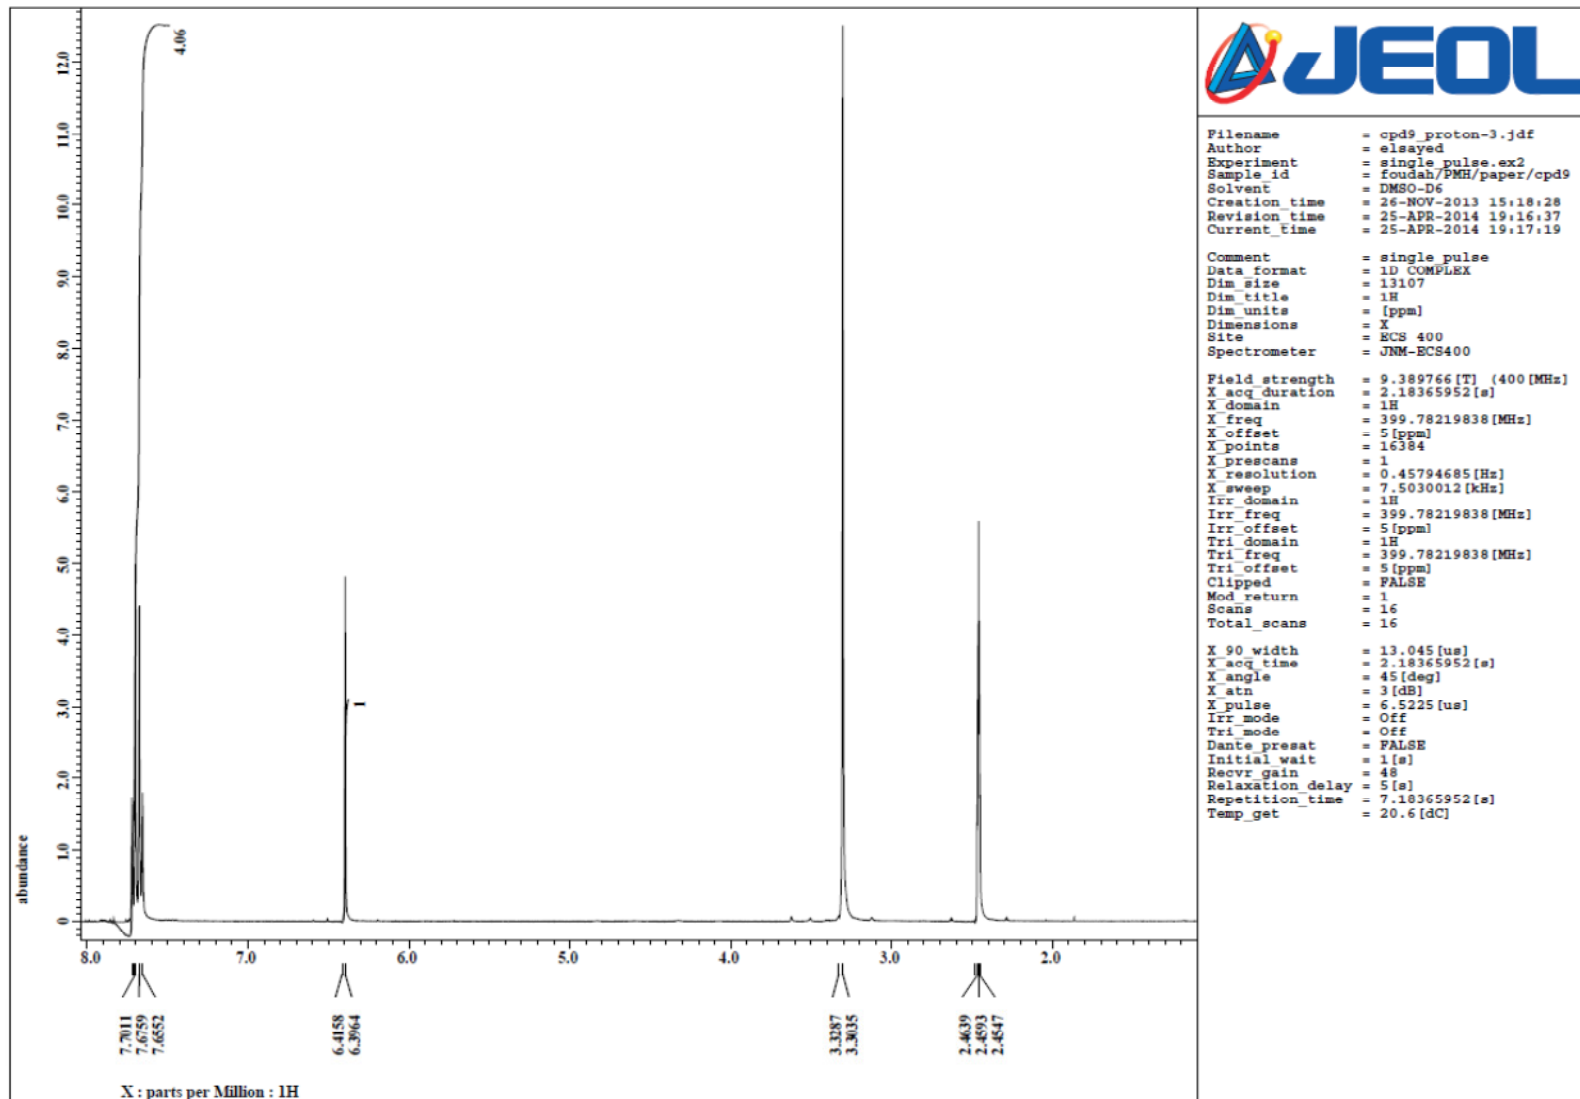

Figure SI15. <sup>1</sup>H NMR Spectrum of 10.

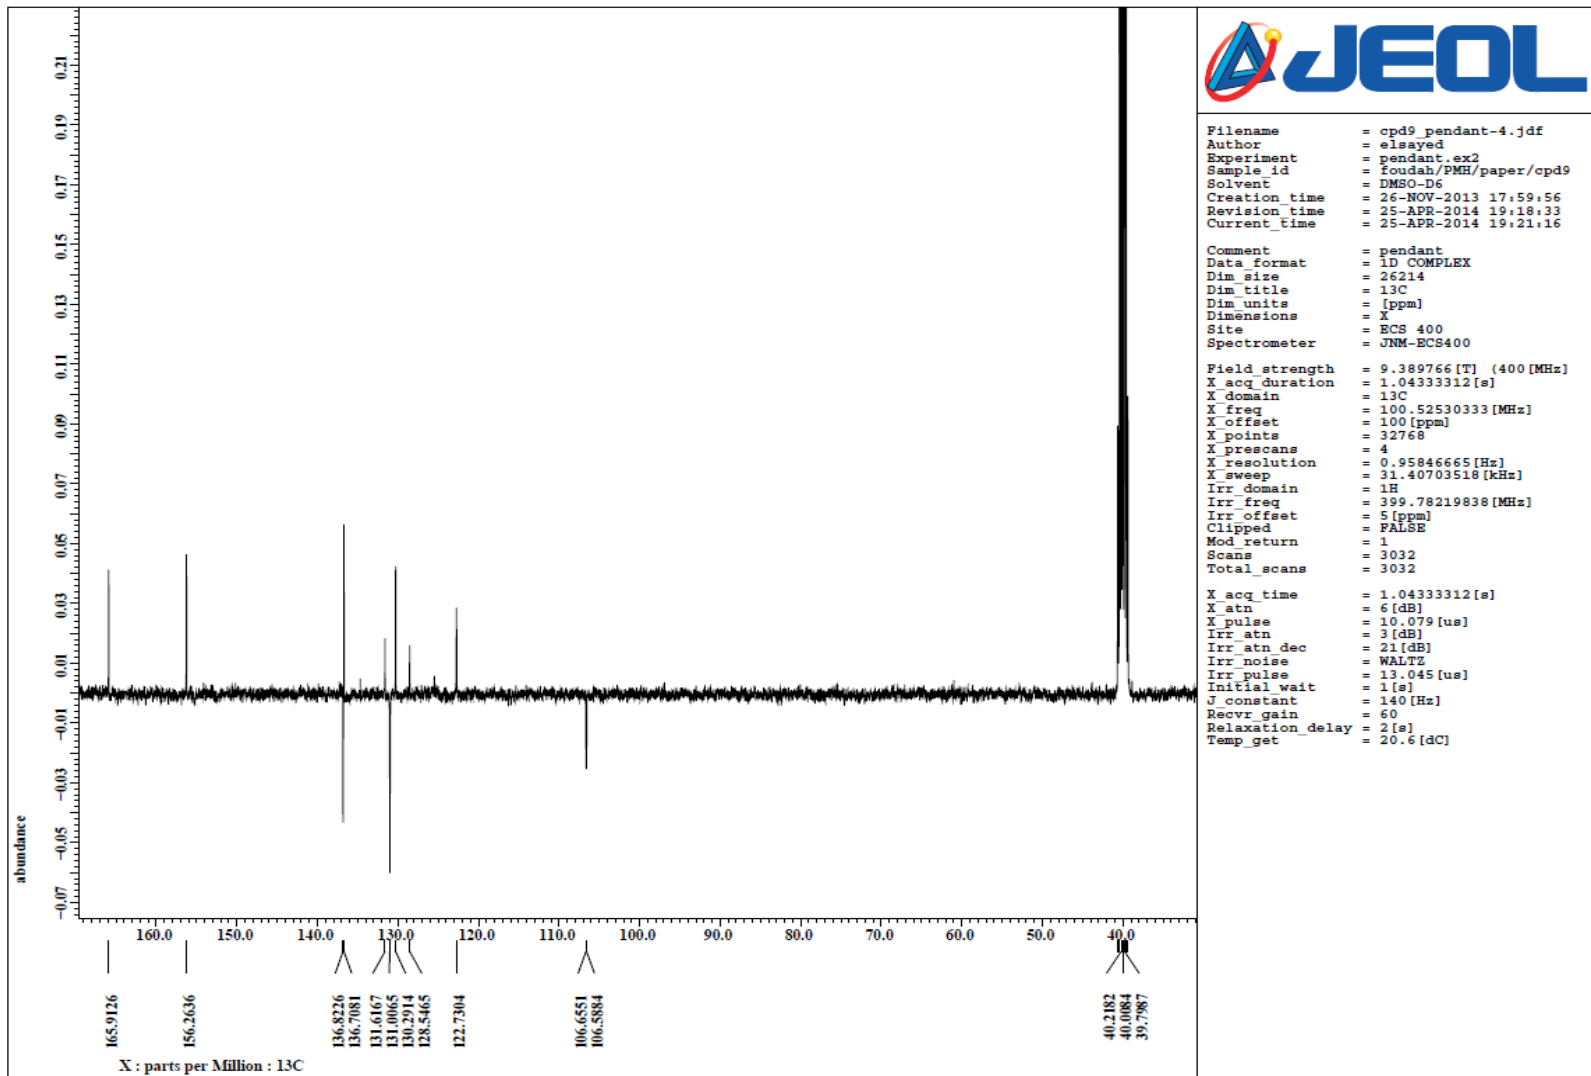

Figure SI16.  $^{13}\text{C}$  NMR (PENDANT) Spectrum of 10.

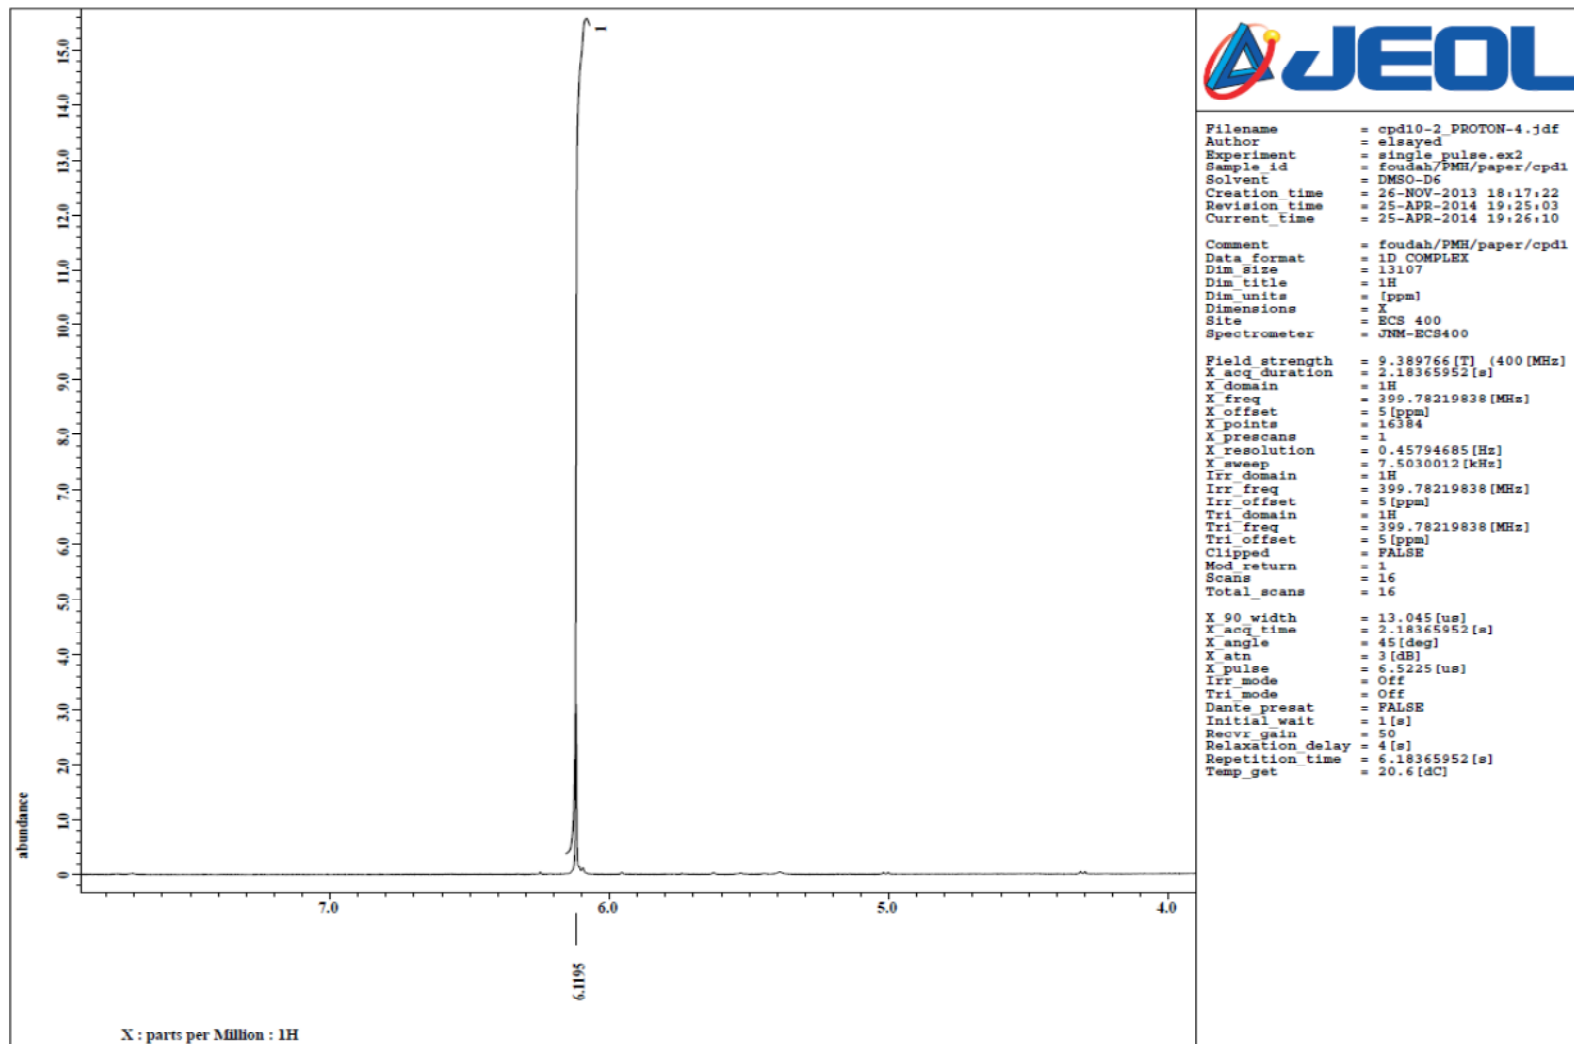

Figure SI17.  $^1\text{H}$  NMR Spectrum of 11.



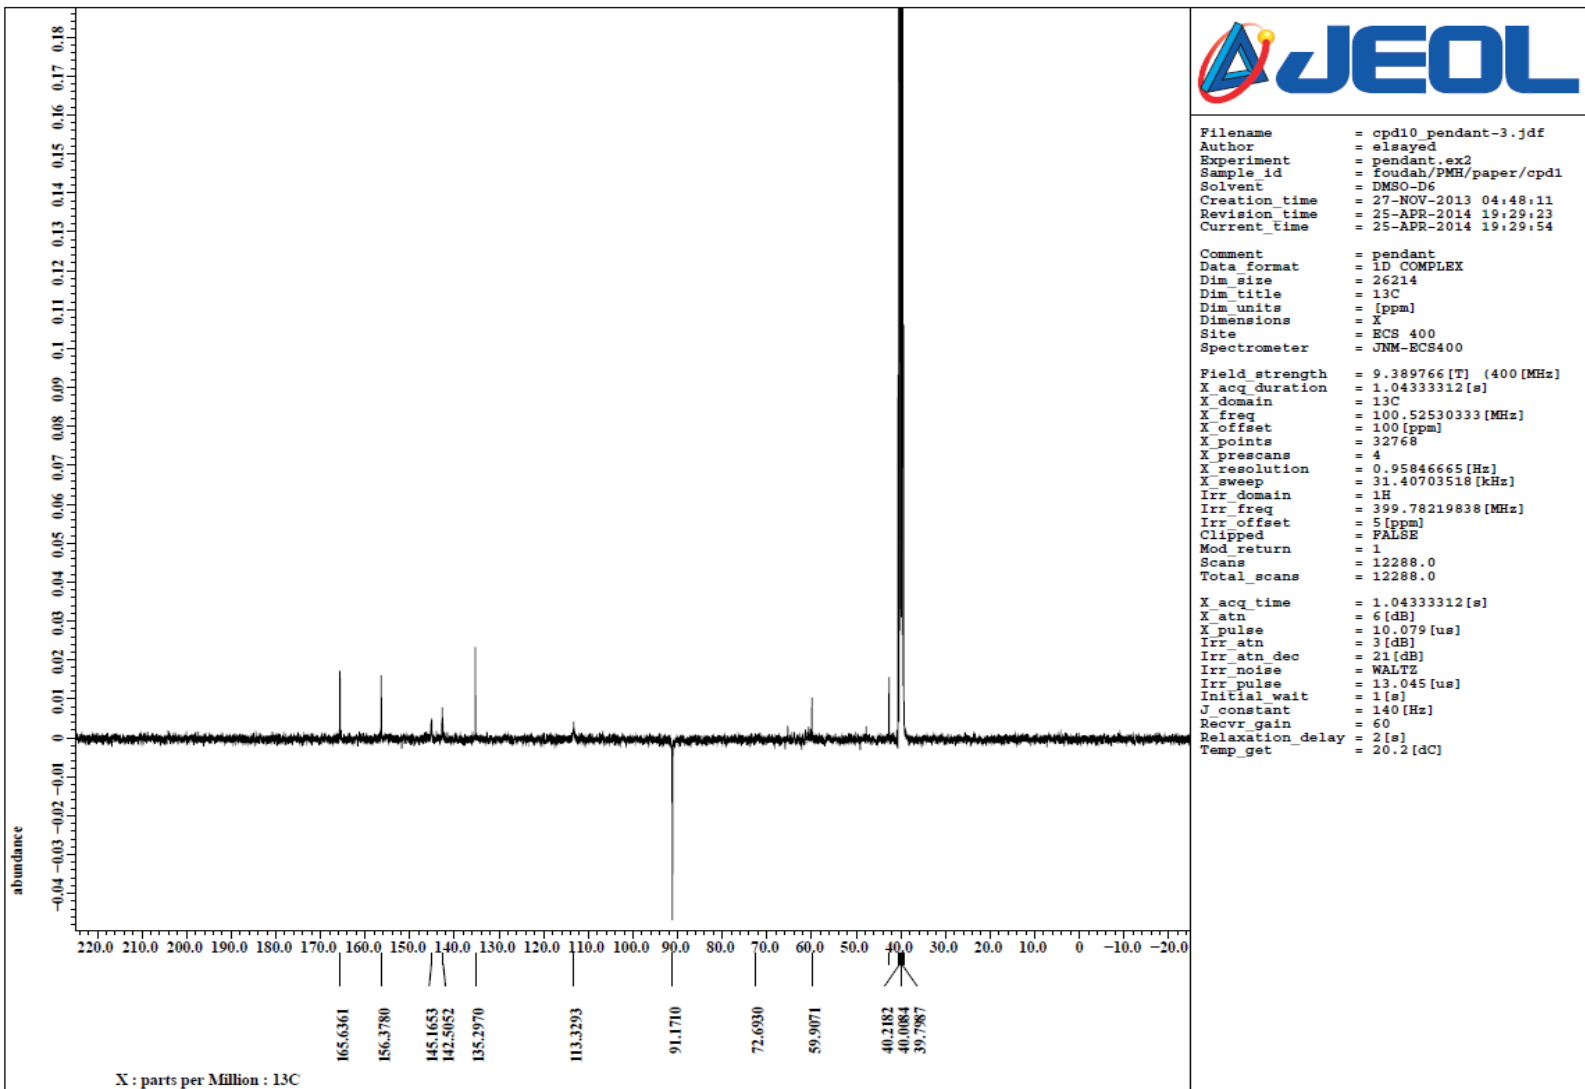

Figure SI18.  $^{13}\text{C}$  NMR (PENDANT) Spectrum of 11.

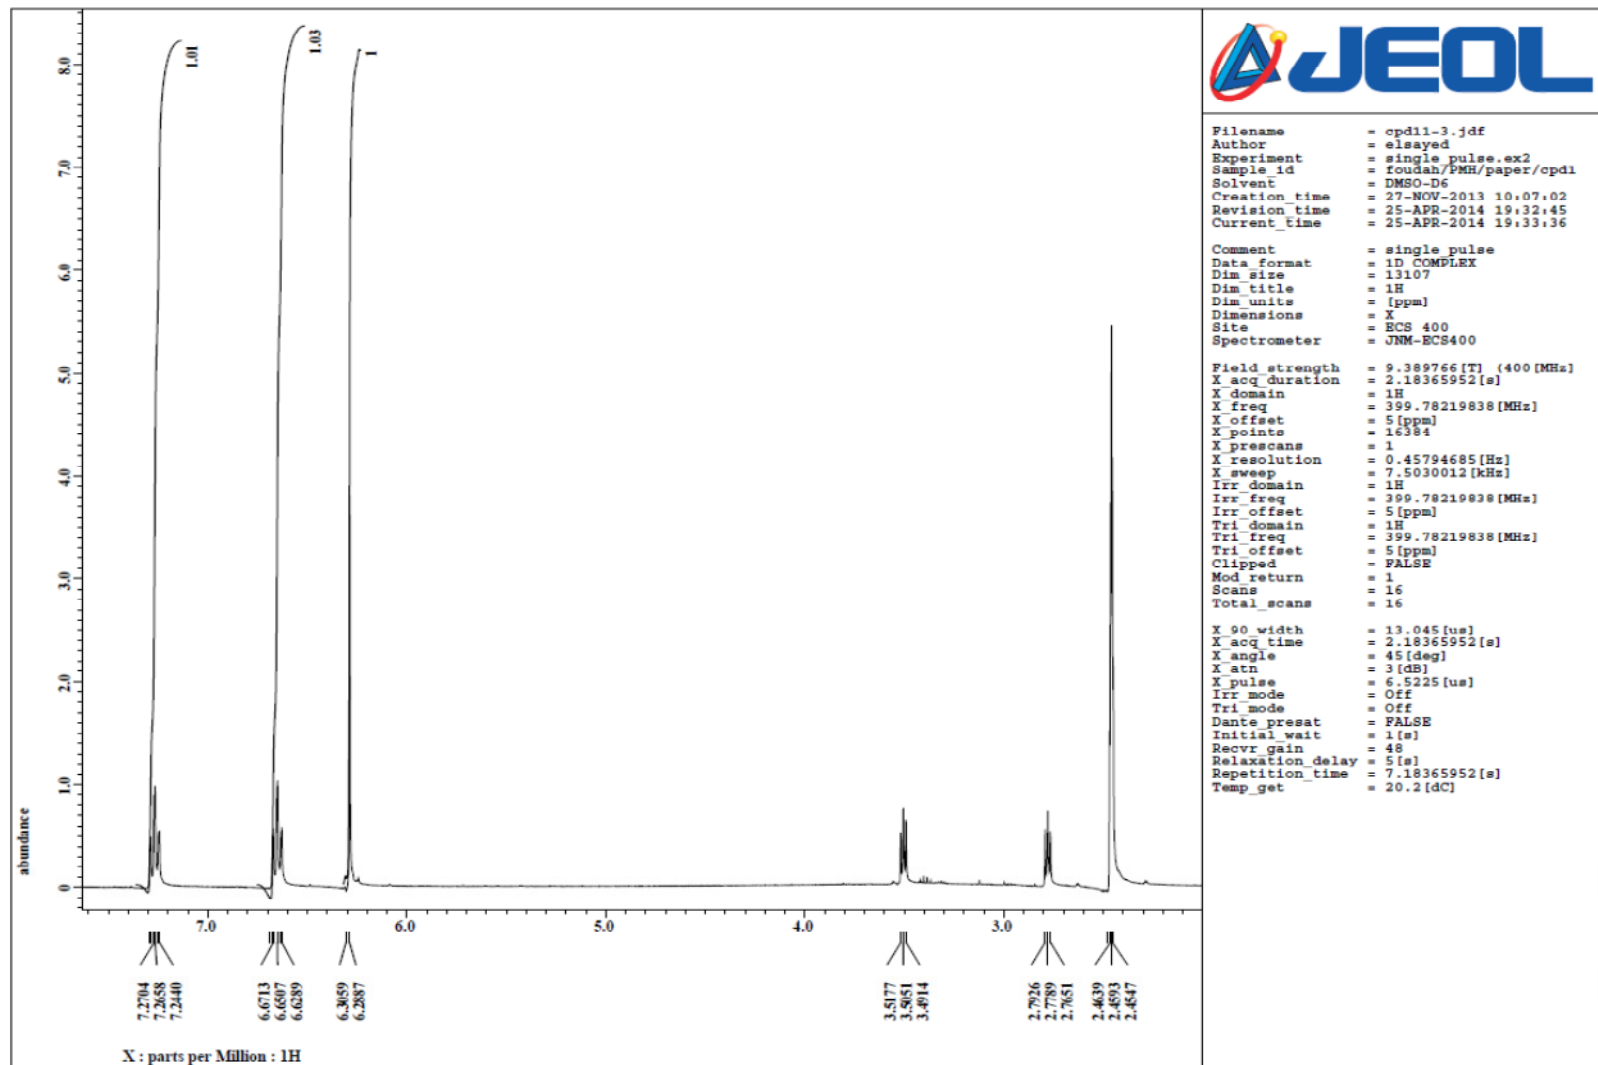

Figure SI19.  $^1\text{H}$  NMR Spectrum of **12**.

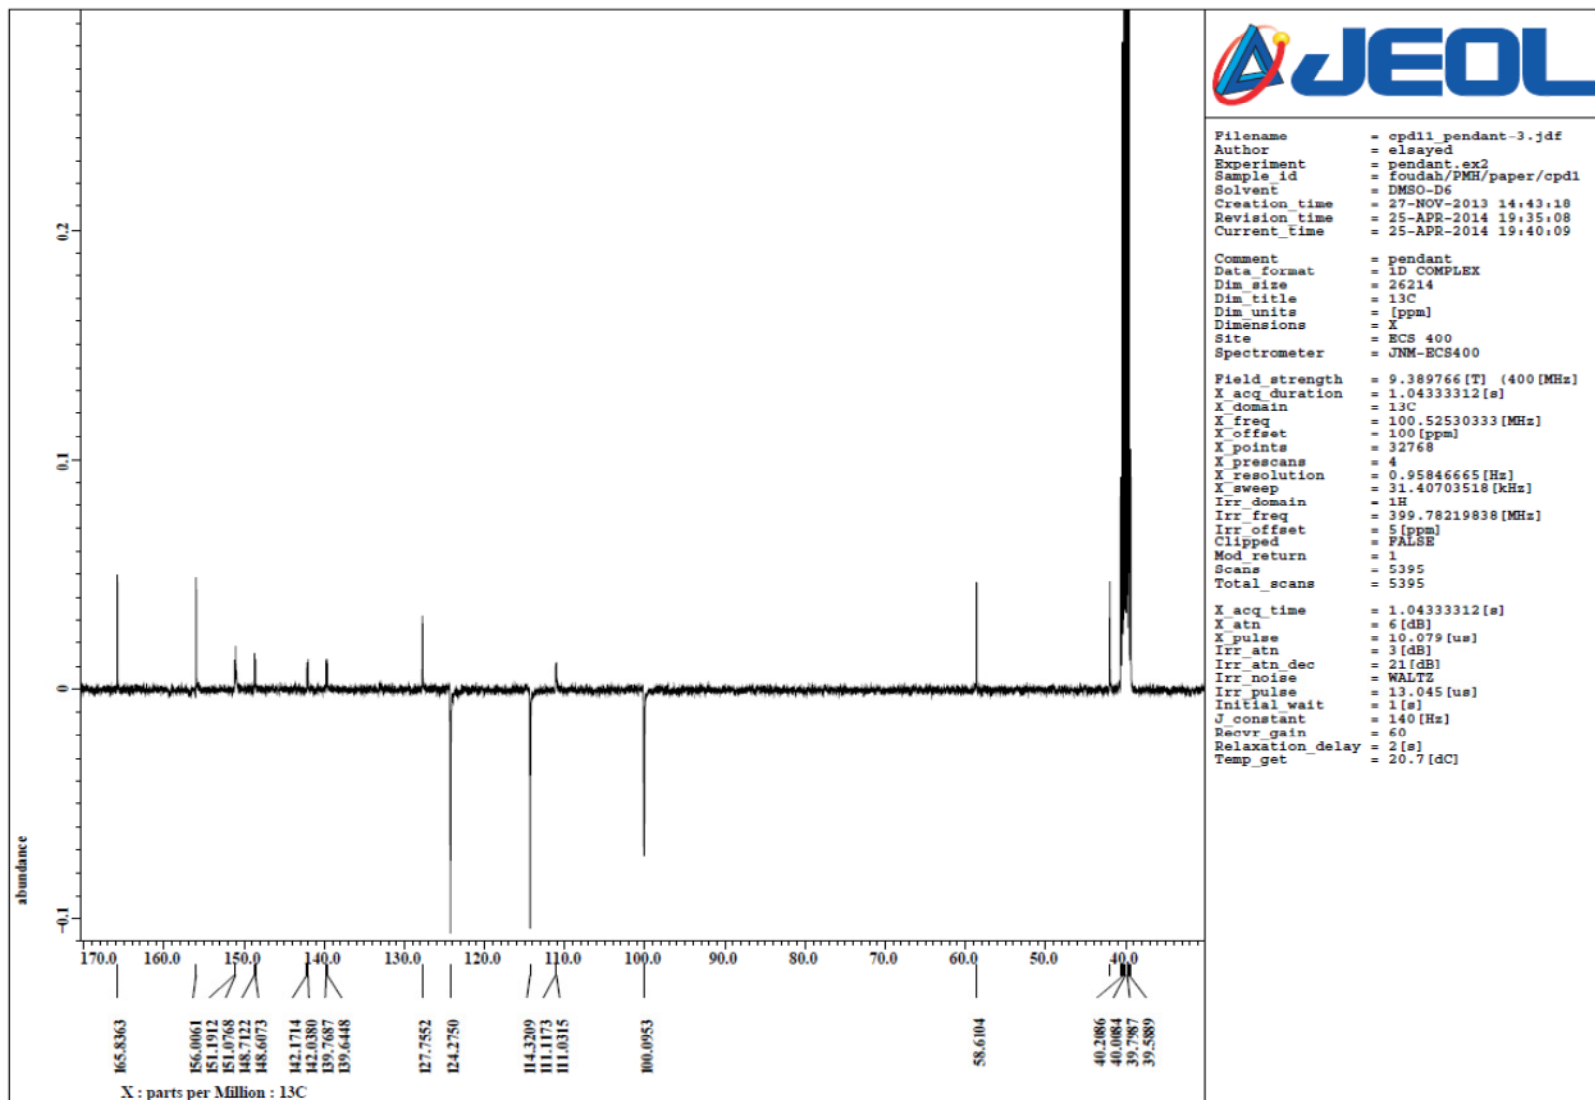

Figure SI20.  $^{13}\text{C}$  NMR (PENDANT) Spectrum of 12.

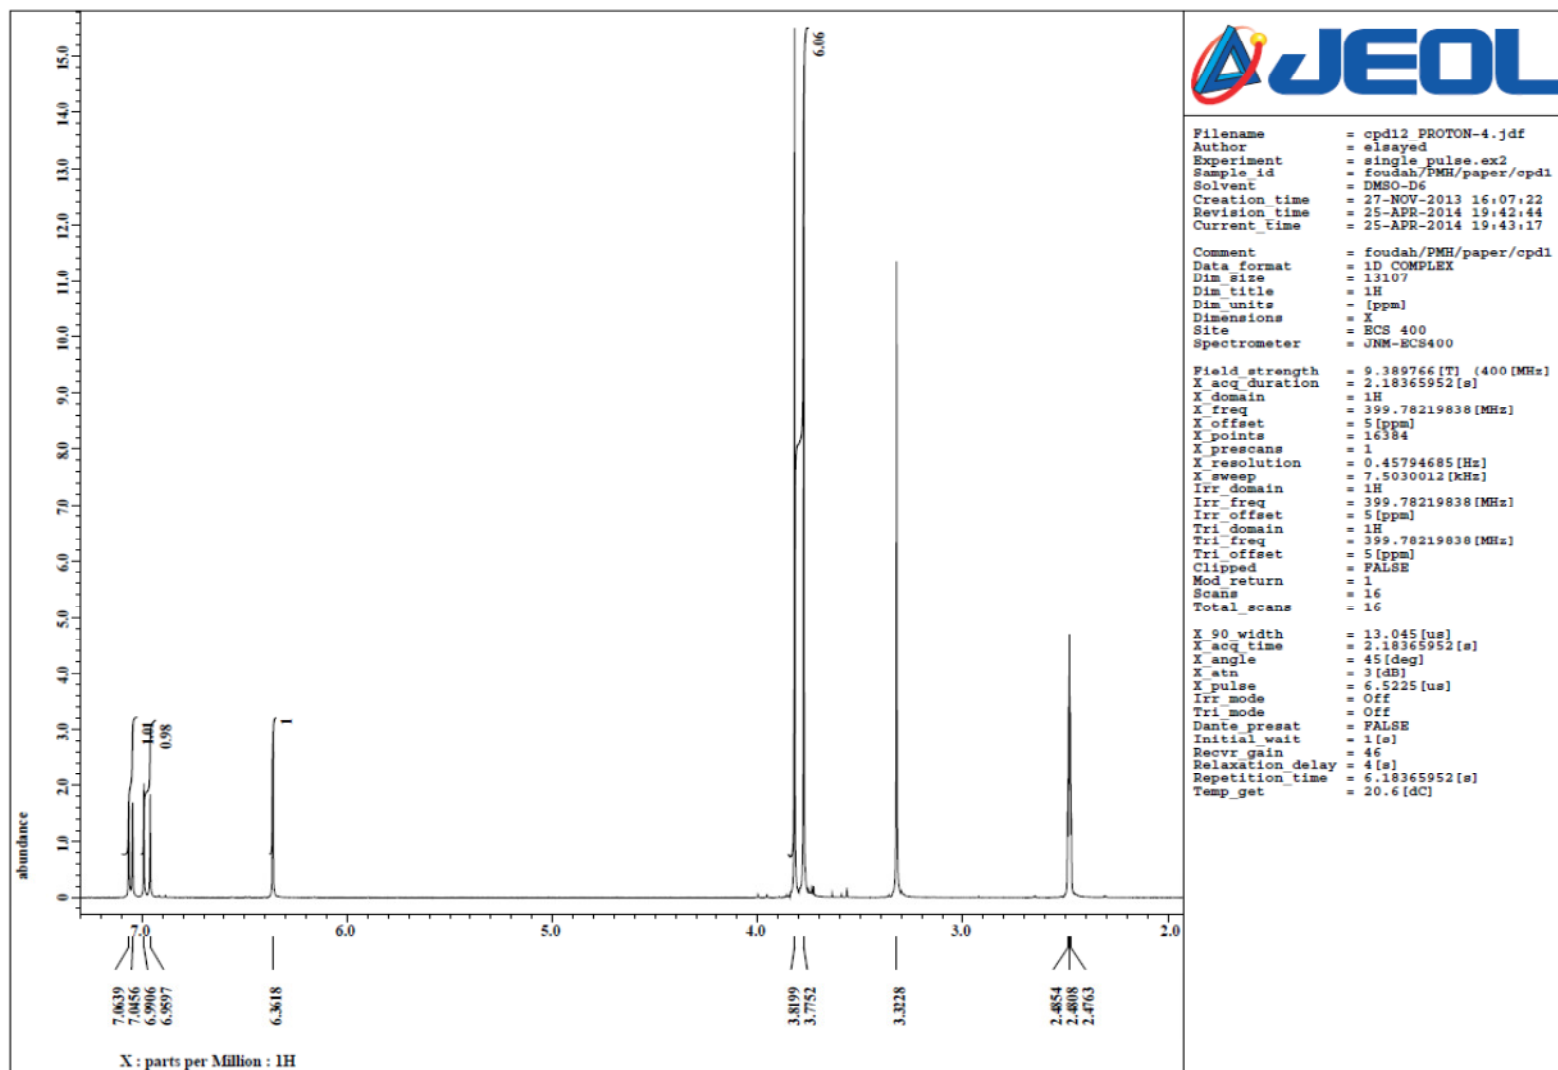

Figure SI21.  $^1\text{H}$  NMR Spectrum of 13.

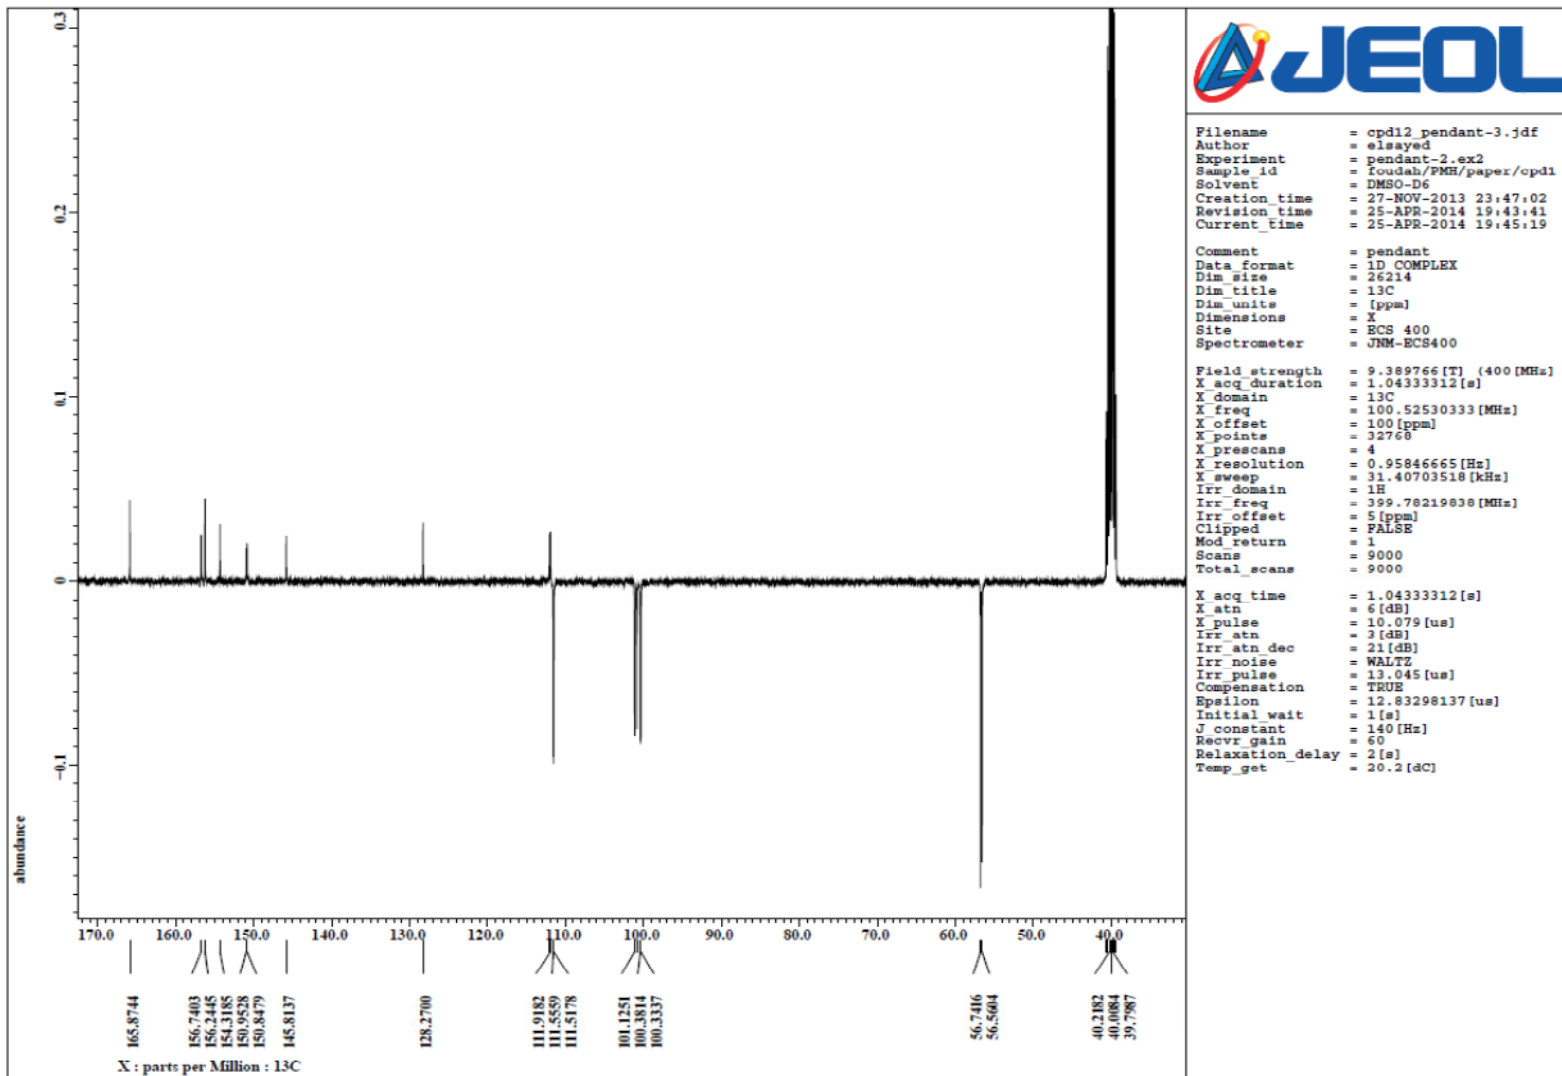

Figure SI22.  $^{13}\text{C}$  NMR (PENDANT) Spectrum of **13**.
